# Supplementary material for: Computer-aided molecular design and selection of CO2 capture solvents based on thermodynamics, reactivity and sustainability
Source: Royal Society of Chemistry journal article supplement (doi:10.1039/c6me00049e), 2016-01-01
Supplement: c6me00049e1.pdf [file c6me00049e1.pdf]

Supporting Information

For

Computer-Aided Molecular Design and Selection  
of CO<sub>2</sub> Capture Solvents Considering  
Thermodynamics, Reactivity and Sustainability

Athanasios I. Papadopoulos<sup>a</sup>, Sara Badr<sup>b</sup>, Alexandros Chremos<sup>c,f</sup>, Esther Forte<sup>c</sup>, Theodoros Zarogiannis<sup>a,d</sup>, Panos Seferlis<sup>d,a1</sup>, Stavros Papadokonstantakis<sup>b,e</sup>, Amparo Galindo<sup>c</sup>, George Jackson<sup>c</sup>, Claire S. Adjiman<sup>c</sup>

<sup>a</sup>Chemical Process and Energy Resources Institute, Centre for Research and Technology-Hellas, 57001 Thermi, Greece

<sup>b</sup>Swiss Federal Institute of Technology, Institute for Chemical- and Bioengineering, Zurich, Switzerland

<sup>c</sup>Imperial College London, Department of Chemical Engineering, Centre for Process Systems Engineering, London SW7 2AZ, UK

<sup>d</sup>Department of Mechanical Engineering, Aristotle University of Thessaloniki, 54124 Thessaloniki, Greece

<sup>e</sup>Chalmers University of Technology, Department of Energy and Environment, Kemivägen 4, 41296 Gothenburg, Sweden

<sup>f</sup>Current address: Materials Science and Engineering Division, National Institute of Standards and Technology, Gaithersburg, MD, 20899, U.S.A.

*Submitted to 21/07/2016*

---

<sup>1</sup> Corresponding author: seferlis@auth.gr

## **Table of Contents**

|                                                                                                     |            |
|-----------------------------------------------------------------------------------------------------|------------|
| <b>Section A: Heuristics for the identification of CO<sub>2</sub> chemisorption solvents.....</b>   | <b>S3</b>  |
| <b>Section B: Calculation methods.....</b>                                                          | <b>S4</b>  |
| <b>Section C: Calculating EHS and LCA metrics .....</b>                                             | <b>S7</b>  |
| <b>Section D: The SAFT-<math>\gamma</math> SW model.....</b>                                        | <b>S11</b> |
| <b>Section E: Data for reported solvents .....</b>                                                  | <b>S14</b> |
| <b>Section F: Assessment of the 29 solvents selected from the databases (Classes C and R) .....</b> | <b>S20</b> |
| <b>Cited References .....</b>                                                                       | <b>S24</b> |

## Section A: Heuristics for the identification of CO<sub>2</sub> chemisorption solvents

Selected rules-of-thumb to identify promising molecular structures for CO<sub>2</sub> capture are listed in Table 1 and explained in this section.

**Structure-Property Relation (1)** relates to the number of carbon atoms that separate amine and hydroxyl groups for high absorption capacity. Following the experimental screening of 76 amines, Puxty et al.<sup>1</sup> found that those with outstanding CO<sub>2</sub> absorption capacities shared several structural features, including hydroxyl functionality two or three carbons away from the amine nitrogen. Yamada et al.<sup>2</sup> also observed that the CO<sub>2</sub> loading increases as the number of carbon atoms between the hydroxyl and the amine nitrogen increase from two to four, with a considerably higher increase from two to three carbon atoms. Hydroxylamines with similar structural characteristics are also proposed in Tontiwachwuthikul et al.<sup>3</sup> as options that enable high CO<sub>2</sub> absorption capacity and low regeneration energy.

**Structure-Property Relation (2)** is based on observations by Aronu et al.<sup>4</sup> that increased chain length between the amine functional groups increases basicity and by Singh and Versteeg<sup>5</sup> that in linear diamines, the desorption capacity increases with increasing separation between the amine groups, up to 6 carbon atoms.

**Structure-Property Relation (3)** indicates that desorption is favoured when a hydroxyl group is present and attached the  $\beta$ -carbon atom (with respect to the amine nitrogen) rather than to the  $\alpha$ -carbon as found by Singh and Versteeg<sup>5</sup> and Singh et al.<sup>6, 7</sup>. The authors conclude, however, that the increase in desorption capacity is associated with a decrease in absorption capacity, which contradicts the ON rule, highlighting the challenges inherent in qualitative rules. In diamines, a similar impact on the desorption capacity is observed when the second amine group appears as a branch from the  $\beta$ -carbon atom relative to the first amine group<sup>5</sup>.

**Structure-Property Relation (4)** indicates that, in the case of linear hydroxylamines, an improved desorption capacity is observed in chains of up to 4 carbon atoms, as the chain length increases<sup>5</sup>.

**Structure-Property Relation (5)** is based on the observation by Zhang et al.<sup>8</sup> that the presence of an alkyl branch in an alkylamine at the  $\beta$ -carbon (with respect to the amine) leads to unwanted bicarbonate precipitation but that branching at an  $\alpha$ -carbon has a positive influence on kinetics.

**Structure-Property Relation (6): Steric hindrance** is a property affecting both the absorption rate and capacity of the solvent. It is associated with the ability of amines to form stable carbamates and affects the amine-CO<sub>2</sub> reaction stoichiometry<sup>9</sup>. In unhindered amines that form stable carbamates the reaction stoichiometry allows for 0.5 mol CO<sub>2</sub> to be absorbed per mole of amine, while in hindered amines this increases to 1 mol CO<sub>2</sub>/mol amine. Steric hindrance is associated with the bulkiness of the substituents attached to the amine group in the molecule. Bulky substituents prohibit CO<sub>2</sub> from reaching the reaction centre hence reducing the reaction rate<sup>10</sup>. Sartori et al.<sup>9</sup> suggested that hindered amines have the following characteristics:

- a primary amine is hindered when the amino group is attached to a tertiary carbon;
- a secondary amine is hindered when the amino group is attached to at least one secondary or tertiary carbon.

A detailed investigation of hindered amines in recent work<sup>11</sup> concluded that they conform to these rules. While there exist methods to calculate parameters related to steric hindrance, such as Taft's steric effect parameter  $\Sigma E_s$ <sup>12</sup>, and the topological steric effect index<sup>10</sup>, they have limited applicability to our current work due to the lack of  $\Sigma E_s$  values for many of the substituents<sup>13</sup>.

## Section B: Calculation methods

### B.1 Scaling of properties

In step 1.2 (section 2.1.2) a scaled value  $x_{i,l_j}^*$  of property  $j$  for this solvent obtained using model  $l_j$  is derived as follows:

$$x_{i,l_j}^* = \frac{x_{i,l_j}'}{\max_{q \in G} \{ |x_{q,l_j}'| \}}, \quad (\text{B1})$$

where  $x_{i,l_j}'$  is given by:

$$x_{i,l_j}' = \frac{x_{i,l_j} - \mu_{l_j}^G}{st_{l_j}^G}, \quad (\text{B2})$$

where  $x_{i,l_j}$  represents the value of property  $j$  for molecule  $i$  computed with model  $l_j$ , and  $\mu_{l_j}^G$  and  $st_{l_j}^G$  represent the mean and standard deviation, respectively, of the property computed with model  $l_j$ , as calculated over the entire set of solvents  $G$ . The standardization scheme applied in equations (B1) and (B2) helps to give equal importance to each property.

In step 2.1 (section 2.2.1) the term  $x_{i,j}^{ave}$  is calculated as follows:

$$x_{i,j}^{ave} = \frac{1}{N_j^{md}} \sum_{l_j=1}^{N_j^{md}} \frac{x_{i,l_j}'}{\max_{q \in G} \{ |x_{q,l_j}'| \}}. \quad (\text{B3})$$

### B.2 Comments on the uncertainty analysis approach

In principle, the outcome of the distribution of ranks may be sensitive to the number of models utilized to predict each property. It would be especially important to use a large number of models if the frequency of appearance of each solvent in the top positions were used as a final solvent selection criterion. In our work, however, the main objective is to facilitate the appearance at the high-performance end of solvents with even a moderate frequency, and to generate from this an overall solvent set which may be easily reviewed and analyzed.

Similarly, we note that uncertainty is not considered in Step 1.1. This may bias the screening procedure and may lead to some potentially high performance solvents being discarded prematurely. Nevertheless, the approach enables the fast identification of solvents with favourable trade-offs among the numerous properties used as performance criteria, while avoiding options with obviously poor performance. This Pareto optimality conditions lead to a few solvents with properties that cover a wide performance spectrum. In this sense, the multi-

objective CAMD approach serves as a sampling procedure that captures a reduced but sufficiently representative set of high-performance solvents.

### B.3 Models used for calculations and uncertainty analysis in Stage 1

**Table B1:** Models used to evaluate the thermodynamic, reactivity and sustainability property criteria in Stage 1.  $j$  denotes the property number,  $N_j^{md}$  the number of property models used for property  $j$ , “No.” the model number and “Description” indicates the source of the model and the auxiliary properties required as input to the model (cf. Table B2).

| $j$ | Property                                              | $N_j^{md}$ | Models |                                                                                 |
|-----|-------------------------------------------------------|------------|--------|---------------------------------------------------------------------------------|
|     |                                                       |            | No.    | Description                                                                     |
| 1   | Relative energy difference, $RED$                     | 2          | 1.1    | $\delta_I$                                                                      |
|     |                                                       |            | 1.2    | $\delta_2$                                                                      |
| 2   | Vapour pressure, $P_{vp}$                             | 3          | 2.1    | Riedel correlation <sup>14</sup> + $T_{c,I}+P_{c,I}+T_{b,I}$                    |
|     |                                                       |            | 2.2    | Riedel correlation <sup>14</sup> + $T_{c,2}+P_{c,2}+T_{b,2}$                    |
|     |                                                       |            | 2.3    | Wisniak et al. <sup>15</sup> + $T_{c,I}+P_{c,I}+T_{b,I}+ \omega$                |
| 3   | Heat capacity, $C_p$                                  | 1          | 3.1    | Rayer et al. <sup>16</sup>                                                      |
| 4   | Density, $\rho$                                       | 2          | 4.1    | $1/V_{m,I}$                                                                     |
|     |                                                       |            | 4.2    | $1/V_{m,2}$                                                                     |
| 5   | Surface tension, $\sigma$                             | 7          | 5.1    | Conte et al. <sup>17</sup>                                                      |
|     |                                                       |            | 5.2    | Sheldon et al. <sup>18</sup> + $V_{m,I}+ \delta_I$                              |
|     |                                                       |            | 5.3    | Sheldon et al. <sup>18</sup> + $V_{m,I}+ \delta_2$                              |
|     |                                                       |            | 5.4    | Sheldon et al. <sup>18</sup> + $V_{m,I}+ \delta_3$                              |
|     |                                                       |            | 5.5    | Sheldon et al. <sup>18</sup> + $V_{m,2}+ \delta_I$                              |
|     |                                                       |            | 5.6    | Sheldon et al. <sup>18</sup> + $V_{m,2}+ \delta_2$                              |
|     |                                                       |            | 5.7    | Sheldon et al. <sup>18</sup> + $V_{m,2}+ \delta_3$                              |
| 6   | Viscosity, $\eta$                                     | 3          | 6.1    | Conte et al. <sup>17</sup>                                                      |
|     |                                                       |            | 6.2    | Sastri and Rao <sup>19</sup> + $T_{b,I}$                                        |
|     |                                                       |            | 6.3    | Sastri and Rao <sup>19</sup> + $T_{b,2}$                                        |
| 7   | Normal melting point, $T_m$                           | 1          | 7.1    | Average from Marrero and Gani <sup>20</sup> and Hukkerikar et al. <sup>21</sup> |
| 8   | Normal boiling point, $T_b$                           | 1          | 8.1    | Average from Marrero and Gani <sup>20</sup> and Hukkerikar et al. <sup>21</sup> |
| 9   | Basicity, $pKa$                                       | 1          | 9.1    | Marvin 6.0.5 <sup>22</sup>                                                      |
| 10  | Cumulative energy demand, $CED$                       | 1          | 10.1   | Ecoinvent or FineChem <sup>23</sup>                                             |
| 11  | Global warming potential, $GWP$                       | 1          | 11.1   | Ecoinvent or FineChem <sup>23</sup>                                             |
| 12  | Eco-Indicator-99, $EI99$                              | 1          | 12.1   | Ecoinvent or FineChem <sup>23</sup>                                             |
| 13  | Health, safety, and environmental impact index, $EHS$ | 1          | 13.1   | Cf. Table C4 in Section C                                                       |

**Table B2:** Auxiliary properties used as input to the models of the property criteria applied to CO<sub>2</sub> capture (cf. Table B1).

| Property                        | Symbol     | Source                                |
|---------------------------------|------------|---------------------------------------|
| Critical temperature            | $T_{c,1}$  | Hukkerikar et al. <sup>21</sup>       |
| Critical temperature            | $T_{c,2}$  | Marrero and Gani <sup>20</sup>        |
| Critical pressure               | $P_{c,1}$  | Hukkerikar et al. <sup>21</sup>       |
| Critical pressure               | $P_{c,2}$  | Marrero and Gani <sup>20</sup>        |
| Normal boiling point            | $T_{b,1}$  | Hukkerikar et al. <sup>21</sup>       |
| Normal boiling point            | $T_{b,2}$  | Marrero and Gani <sup>20</sup>        |
| Acentric factor                 | $\Omega$   | Hukkerikar et al. <sup>21</sup>       |
| Molar volume                    | $V_{m,1}$  | Hukkerikar et al. <sup>20</sup>       |
| Molar volume                    | $V_{m,2}$  | Constantinou et al. <sup>24</sup>     |
| Hansen solubility parameter     | $\delta_1$ | Hukkerikar et al. <sup>21</sup>       |
| Hansen solubility parameter     | $\delta_2$ | Stefanis and Panayiotou <sup>25</sup> |
| Hildebrand solubility parameter | $\delta_3$ | Sheldon et al. <sup>4</sup>           |

#### B.4. Calculation of the *RED* index

Hansen<sup>26</sup> divided the solubility parameter into three partial solubility parameters (HSPs), namely the dispersion cohesive energy density HSP ( $\delta_d$ ), the polar cohesive energy density HSP ( $\delta_p$ ), and the hydrogen bonding cohesive energy density HSP ( $\delta_h$ ). This partitioning enables the separate consideration of polar and non-polar interactions. The total Hansen solubility parameter is defined as follows:

$$\delta_t = \sqrt{\delta_d^2 + \delta_p^2 + \delta_h^2}. \quad (\text{B4})$$

Furthermore, the ability of a solvent (B) to dissolve a solute (A) is calculated based on the distance measure  $R_a$  as follows<sup>25</sup>:

$$R_a^2 = 4(\delta_{d,A} - \delta_{d,B})^2 + (\delta_{p,A} - \delta_{p,B})^2 + (\delta_{h,A} - \delta_{h,B})^2. \quad (\text{B5})$$

This equation can be used in the so-called relative energy difference (*RED*) number<sup>25</sup> as follows:

$$RED = \frac{R_a}{R_0}, \quad (\text{B6})$$

where  $R_0$  is the radius of a Hansen solubility parameter sphere that provides an acceptable distance for the solute of interest<sup>25, 27</sup>. According to Retief<sup>28</sup>, the  $R_0$  value for CO<sub>2</sub> is 3.3 MPa<sup>0.5</sup>, while for A = CO<sub>2</sub> in equation (B5) the values are  $\delta_{d,A} = 15.7$  MPa<sup>0.5</sup>,  $\delta_{p,A} = 5.2$  MPa<sup>0.5</sup>,  $\delta_{h,A} = 5.8$  MPa<sup>0.5</sup>.

## Section C: Calculating EHS and LCA metrics

The scores for the characteristic dangerous properties are calculated based on empirically-derived scales of parameters such as flash points, boiling points, toxicity classification schemes, lethal doses and concentrations, half-lives, octanol/water partitioning coefficients. Sugiyama et al.<sup>29</sup> updated the method with respect to the dangerous property priorities, and considered scaling and scoring methods. The assessment is designed to use pure component properties, since mixture hazard properties are composition specific and both data and reliable estimation models are largely unavailable. Solvent properties are collected from material safety data sheets whenever possible and Quantitative Structure Activity Relationships (QSARs) are used to fill some of the data gaps. The Estimation Program Interface (EPI) Suite<sup>30</sup> and the Toxicity Estimation Software Tool (TEST)<sup>31</sup> developed by the US Environmental Protection Agency are used in that respect. An average of the dangerous properties calculated by the EHS method versions is used to avoid missing scores in the case of persisting data gaps. The EHS score is the sum of the safety, health and environmental scores.

Tables C1 to C3 present in detail the data for the LCA and EHS metrics used in solvent selection and Table C4 refers to the respective data sources for the EHS assessment. Most estimation methods for the EHS categories and the FineChem<sup>23</sup> tool for LCA metrics require the molecular structure and group connectivity to be determined in advance and represented in Simplified Molecular Input Line Entry System (SMILES). However, the relation between the SMILES and the set of molecular structure according to the CAMD procedure is not an injective function, namely more than one SMILES can relate to the same molecular descriptors of the CAMD algorithm. Therefore, in the Design Problem, an algorithm was developed to randomly combine the different molecular descriptors representing a new molecule and create a maximum of 100 feasible, unique SMILES per set of descriptors. The required properties were then estimated for the set of SMILES and averaged to represent the value of the respective CAMD derived molecular structure.

**Table C1(a):** LCA metrics as predicted by the FineChem<sup>23</sup> tool for the solvents of Figure 3.

| LCA metrics                     | 1M2P  | DPE  | 4A2B | 3DAP  | ND1B  | 1EDB  | 2P12P | 4AP   | 4D1B |
|---------------------------------|-------|------|------|-------|-------|-------|-------|-------|------|
| CED (MJ-eq/kg)                  | 106.1 | 93.5 | 93.5 | 108.1 | 107.4 | 106.1 | 165.9 | 106.7 | 93.5 |
| GWP (kg CO <sub>2</sub> -eq/kg) | 3.4   | 3.6  | 3.6  | 3.2   | 3.3   | 3.4   | 9.6   | 3.4   | 3.6  |
| EI-99 (pt/kg)                   | 0.22  | 0.30 | 0.30 | 0.24  | 0.23  | 0.22  | 0.83  | 0.23  | 0.30 |

**Table C1(b):** EHS index values and their decomposition into safety, health and environment categories, dangerous property indices (DPI) and related primary properties (PP) for the solvents of Figure 3 (e.g., the indicator “boiling point” is used to derive the value of the dangerous property called “mobility”).

|             | Primary and Dangerous properties | 1M2P     | DPE      | 4A2B     | 3DAP     | ND1B     | 1EDB     | 2P12P    | 4AP      | 4D1B     |
|-------------|----------------------------------|----------|----------|----------|----------|----------|----------|----------|----------|----------|
| PP          | Boiling point (°C)               | 141      | 144      | 144      | 196      | 176      | 167      | 150      | 180      | 139      |
| DPI         | Mobility                         | 0.53     | 0.51     | 0.51     | 0.30     | 0.38     | 0.42     | 0.49     | 0.37     | 0.53     |
| PP          | Flashpoint (°C)                  | 73       | 30       | 27       | 69       | 60       | 73       | 33       | 83       | 21       |
| DPI         | Flammability                     | 0.86     | 0.96     | 0.97     | 0.81     | 0.86     | 0.83     | 0.95     | 0.79     | 0.98     |
| PP          | LD50oral (mg/kg)                 | 3167     | 258      | 326      | 1581     | 1150     | 3835     | 764      | 2739     | 409      |
| DPI         | Acute toxicity                   | 0.11     | 0.38     | 0.36     | 0.00     | 0.08     | 0.00     | 0.24     | 0.00     | 0.35     |
| PP          | Oxygen balance (%)               | -224.36  | -315.67  | -315.67  | -262.15  | -252.57  | -224.36  | -288.36  | -240.38  | -315.67  |
| DPI         | Reaction/Decomposition           | 0.14     | 0.00     | 0.00     | 0.00     | 0.00     | 0.14     | 0.00     | 0.00     | 0.00     |
| PP          | PH                               | 12.09    | 12.41    | 12.29    | 11.99    | 11.89    | 12.05    | 12.11    | 12.19    | 12.27    |
| DPI         | Irritation                       | 0.86     | 0.93     | 0.90     | 0.72     | 0.73     | 0.79     | 0.84     | 0.80     | 0.90     |
| PP          | PP                               | 0.11     | 0.38     | 0.36     | 0.00     | 0.08     | 0.00     | 0.24     | 0.00     | 0.35     |
| DPI         | Chronic toxicity                 | 0.07     | 0.29     | 0.26     | 0.00     | 0.02     | 0.00     | 0.17     | 0.00     | 0.27     |
| PP          | Persistence (days)               | 24       | 20       | 13       | 23       | 23       | 25       | 48       | 25       | 28       |
| DPI         | Environmental Degradation        | 0.69     | 0.65     | 0.55     | 0.68     | 0.68     | 0.70     | 0.84     | 0.70     | 0.72     |
| PP          | LC50aq(mg/l) Water               | 195      | 72       | 74       | 148      | 159      | 273      | 160      | 96       | 54       |
| DPI         | mediated effects                 | 0.10     | 0.20     | 0.17     | 0.13     | 0.12     | 0.07     | 0.16     | 0.18     | 0.25     |
| PP          | Chronic toxicity                 | 0.07     | 0.29     | 0.26     | 0.00     | 0.02     | 0.00     | 0.17     | 0.00     | 0.27     |
| DPI         | Air mediated effects             | 0.00     | 0.21     | 0.14     | 0.06     | 0.09     | 0.00     | 0.20     | 0.02     | 0.20     |
| PP          | log (BCF*)                       | 0.50     | 1.44     | 1.31     | 0.35     | 0.49     | 0.21     | 0.50     | 0.50     | 1.26     |
| DPI         | Accumulation                     | 0.00     | 0.00     | 0.00     | 0.00     | 0.00     | 0.00     | 0.00     | 0.00     | 0.00     |
| PP          | Substance type                   | organics |
| DPI         | Solid waste                      | 0.00     | 0.00     | 0.00     | 0.00     | 0.00     | 0.00     | 0.00     | 0.00     | 0.00     |
| Safety      |                                  | 1.63     | 1.86     | 1.84     | 1.12     | 1.33     | 1.39     | 1.68     | 1.87     | 1.17     |
| Health      |                                  | 0.93     | 1.21     | 1.16     | 0.72     | 0.76     | 0.79     | 1.01     | 1.17     | 0.80     |
| Environment |                                  | 0.79     | 1.06     | 0.86     | 0.87     | 0.88     | 0.77     | 1.20     | 1.17     | 0.90     |
| EHS         |                                  | 3.35     | 4.13     | 3.86     | 2.70     | 2.96     | 2.95     | 3.89     | 4.21     | 2.87     |

\*BCF: Bioconcentration factor



**Table C2(a):** LCA metrics as predicted by the FineChem<sup>23</sup> tool for the solvents of Figure 4a. MEA is also included for reference and 4AP data can be found in Table C1a.

| LCA metrics                     | MEA   | 2AP   | MMEA  | EMEA  | MPA   | DEAB  | 2A1B  | 2A1PN | IPAE  | DBA  |
|---------------------------------|-------|-------|-------|-------|-------|-------|-------|-------|-------|------|
| CED (MJ-eq/kg)                  | 105.5 | 105.8 | 105.8 | 106.1 | 105.8 | 108.7 | 106.1 | 106.7 | 106.7 | 93.5 |
| GWP (kg CO <sub>2</sub> -eq/kg) | 3.5   | 3.4   | 3.4   | 3.4   | 3.4   | 3.2   | 3.4   | 3.4   | 3.4   | 3.6  |
| EI-99 (pt/kg)                   | 0.18  | 0.20  | 0.20  | 0.22  | 0.20  | 0.25  | 0.22  | 0.22  | 0.23  | 0.30 |

**Table C2(b):** EHS index values and their decomposition into safety, health and environment categories, dangerous properties (index) and related indicators for the solvents of Figure 4a (e.g., the indicator “boiling point” is used to derive the value of the dangerous property called “mobility”). MEA is also included for reference and 4AP data can be found in Table C1b.

|             | Primary and Dangerous properties | MEA          | 2AP      | MMEA              | EMEA         | MPA                  | DEAB       | 2A1B       | 2A1PN      | IPAE       | DBA       |
|-------------|----------------------------------|--------------|----------|-------------------|--------------|----------------------|------------|------------|------------|------------|-----------|
| PP          | Boiling point ( °C)              | 129          | 134      | 126               | 151          | 153                  | 208        | 158        | 180        | 165        | 165       |
| DPI         | Mobility                         | 0.58         | 0.55     | 0.59              | 0.49         | 0.48                 | 0.26       | 0.46       | 0.37       | 0.43       | 0.43      |
| PP          | Flashpoint ( °C)                 | 85           | 71       | 76                | 71           | 79                   | 72         | 82         | 95         | 70         | 40        |
| DPI         | Flammability                     | 0.84         | 0.87     | 0.87              | 0.85         | 0.83                 | 0.80       | 0.82       | 0.77       | 0.84       | 0.92      |
| PP          | LD50oral (mg/kg)                 | IDLH (30ppm) | 1765     | R-pharse (R21/22) | EU-c(T)      | R-pharse (R20/21/22) | 1659       | 1989       | 4351       | 1968       | EU-c (Xn) |
| DPI         | Acute toxicity                   | 0.79         | 0.20     | 0.36              | 0.56         | 0.31                 | 0.00       | 0.09       | 0.00       | 0.07       | 0.29      |
| PP          | Oxygen balance (%)               | -170.3       | -202.4   | -202.4            | -224.4       | -202.4               | -269.9     | -224.4     | -240.4     | -240.4     | -315.7    |
| DPI         | Reaction/Decomposition           | 0.00         | 0.00     | 0.00              | 0.00         | 0.00                 | 0.00       | 0.14       | 0.00       | 0.00       | 0.15      |
| PP          | LD50dermal (mg/kg)               | EU-c (C)     | EU-c (C) | EU-c (C)          | R-code (R34) | EU-c (C)             | PH (12.52) | PH (12.05) | PH (12.05) | PH (12.12) | 768       |
| DPI         | Irritation                       | 0.87         | 0.86     | 0.87              | 0.84         | 0.84                 | 0.82       | 0.81       | 0.77       | 0.82       | 0.39      |
| PP          | Acute toxicity                   | 0.79         | 0.20     | 0.36              | 0.56         | 0.31                 | 0.00       | 0.09       | 0.00       | 0.07       | 0.29      |
| DPI         | Chronic toxicity                 | 0.64         | 0.08     | 0.29              | 0.44         | 0.08                 | 0.00       | 0.04       | 0.00       | 0.02       | 0.21      |
| PP          | Persistency (days)               | 25           | 24       | 24                | 25           | 25                   | 22         | 25         | 25         | 24         | 11        |
| DPI         | Environmental Degradation        | 0.69         | 0.69     | 0.69              | 0.69         | 0.70                 | 0.67       | 0.70       | 0.70       | 0.69       | 0.52      |
| PP          | LC50aq(mg/l)                     | 502          | 267      | 331               | 294          | 543                  | 119        | 116        | 73         | 277        | 49        |
| DPI         | Water mediated effects           | 0.04         | 0.07     | 0.06              | 0.07         | 0.03                 | 0.15       | 0.16       | 0.21       | 0.07       | 0.20      |
| PP          | Chronic toxicity                 | 0.64         | 0.08     | 0.29              | 0.44         | 0.08                 | 0.00       | 0.04       | 0.00       | 0.02       | 0.21      |
| DPI         | Air mediated effects             | 0.58         | 0.03     | 0.22              | 0.42         | 0.07                 | 0.05       | 0.05       | 0.00       | 0.04       | 0.18      |
| PP          | log (BCF)                        | 0.50         | 0.50     | 0.50              | 0.50         | 0.50                 | 0.45       | 0.50       | 0.09       | 0.12       | 1.53      |
| DPI         | Accumulation                     | 0.00         | 0.00     | 0.00              | 0.00         | 0.00                 | 0.00       | 0.00       | 0.00       | 0.00       | 0.00      |
| PP          | Substance type                   | organic      | organic  | organic           | organic      | organic              | organic    | organic    | organic    | organic    | organic   |
| DPI         | Solid waste                      | 0.00         | 0.00     | 0.00              | 0.00         | 0.00                 | 0.00       | 0.00       | 0.00       | 0.00       | 0.00      |
| Safety      |                                  | 2.20         | 1.63     | 1.82              | 1.90         | 1.62                 | 1.05       | 1.51       | 1.14       | 1.35       | 1.79      |
| Health      |                                  | 1.51         | 0.94     | 1.16              | 1.28         | 0.92                 | 0.82       | 0.86       | 0.77       | 0.84       | 0.60      |
| Environment |                                  | 1.31         | 0.79     | 0.97              | 1.18         | 0.80                 | 0.86       | 0.90       | 0.91       | 0.80       | 0.90      |
| EHS         |                                  | 5.02         | 3.36     | 3.95              | 4.37         | 3.34                 | 2.74       | 3.26       | 2.82       | 2.98       | 3.28      |

\*BCF: Bioconcentration factor

**Table C3(a):** LCA metrics as predicted by the FineChem<sup>23</sup> tool for the design solvents of Figure 5. The absence of data for E7 and D6 is elaborated in the caption of Figure 5.

| LCA metrics                     | D1    | D2    | D3    | D4    | D5    | D7    | D8    | D9    | D10   |
|---------------------------------|-------|-------|-------|-------|-------|-------|-------|-------|-------|
| CED (MJ-eq/kg)                  | 164.6 | 150.5 | 148.9 | 149.0 | 148.8 | 140.6 | 175.3 | 176.6 | 180.4 |
| GWP (kg CO <sub>2</sub> -eq/kg) | 6.9   | 4.2   | 5.8   | 6.0   | 5.7   | 4.2   | 6.9   | 6.8   | 7.1   |
| EI-99 (pt/kg)                   | 1.05  | 0.59  | 0.98  | 1.00  | 0.98  | 0.51  | 0.36  | 0.41  | 0.46  |

**Table C3(b):** EHS index values and their decomposition into safety, health and environment categories, dangerous properties (index) and related indicators for the solvents of Figure 5 (e.g., the indicator “boiling point” is used to derive the value of the dangerous property called “mobility”). The absence of data for E7 and D6 is elaborated in the caption of Figure 5.

|             | Primary and Dangerous properties | D1       | D2       | D3       | D4       | D5       | D7       | D8       | D9       | D10      |
|-------------|----------------------------------|----------|----------|----------|----------|----------|----------|----------|----------|----------|
| PP          | Boiling point (°C)               | 222      | 197      | 195      | 225      | 195      | 203      | 184      | 206      | 203      |
| DPI         | Mobility                         | 0.20     | 0.30     | 0.31     | 0.19     | 0.31     | 0.28     | 0.35     | 0.27     | 0.28     |
| PP          | Flashpoint (°C)                  | 90       | 67       | 68       | 118      | 90       | 83       | 84       | 100      | 89       |
| DPI         | Flammability                     | 0.74     | 0.82     | 0.82     | 0.66     | 0.76     | 0.77     | 0.79     | 0.73     | 0.76     |
| PP          | LD50oral (mg/kg)                 | 584      | 761      | 849      | 1114     | 1066     | 1232     | 2301     | 1986     | 1879     |
| DPI         | Acute toxicity                   | 0.00     | 0.05     | 0.05     | 0.00     | 0.02     | 0.00     | 0.00     | 0.00     | 0.00     |
| PP          | Oxygen balance (%)               | -266.20  | -262.15  | -258.86  | -266.20  | -249.95  | -262.15  | -        | -216.61  | -216.61  |
| DPI         | Reaction/Decomposition           | 0.00     | 0.00     | 0.00     | 0.00     | 0.00     | 0.00     | 0.00     | 0.20     | 0.20     |
| PP          | PH                               | 12.06    | 12.08    | 11.68    | 12.07    | 11.61    | 12.17    | 11.42    | 11.63    | 11.62    |
| DPI         | Irritation                       | 0.69     | 0.74     | 0.65     | 0.68     | 0.63     | 0.75     | 0.60     | 0.61     | 0.61     |
| PP          | Acute toxicity                   | 0.00     | 0.05     | 0.05     | 0.00     | 0.02     | 0.00     | 0.00     | 0.00     | 0.00     |
| DPI         | Chronic toxicity                 | 0.00     | 0.00     | 0.00     | 0.00     | 0.00     | 0.00     | 0.00     | 0.00     | 0.00     |
| PP          | Persistence (days)               | 64       | 44       | 51       | 62       | 28       | 31       | 24       | 25       | 25       |
| DPI         | Environmental Degradation        | 0.90     | 0.82     | 0.85     | 0.90     | 0.72     | 0.74     | 0.69     | 0.69     | 0.70     |
| PP          | LC50aq(mg/l) Water               | 5        | 67       | 28       | 7        | 19       | 47       | 26       | 185      | 27       |
| DPI         | mediated effects                 | 0.55     | 0.25     | 0.35     | 0.51     | 0.36     | 0.26     | 0.32     | 0.10     | 0.32     |
| PP          | Chronic toxicity                 | 0.00     | 0.00     | 0.00     | 0.00     | 0.00     | 0.00     | 0.00     | 0.00     | 0.00     |
| DPI         | Air mediated effects             | 0.26     | 0.20     | 0.20     | 0.20     | 0.12     | 0.11     | 0.03     | 0.04     | 0.05     |
| PP          | log (BCF)                        | 0.28     | 0.41     | 0.13     | 0.26     | -0.02    | 0.37     | -0.01    | -0.07    | -0.01    |
| DPI         | Accumulation                     | 0.00     | 0.00     | 0.00     | 0.00     | 0.00     | 0.00     | 0.00     | 0.00     | 0.00     |
| PP          | Substance type                   | organics |
| DPI         | Solid waste                      | 0.00     | 0.00     | 0.00     | 0.00     | 0.00     | 0.00     | 0.00     | 0.00     | 0.00     |
| Safety      |                                  | 0.94     | 1.17     | 1.18     | 0.85     | 1.09     | 1.05     | 1.14     | 1.19     | 1.23     |
| Health      |                                  | 0.69     | 0.74     | 0.65     | 0.68     | 0.63     | 0.75     | 0.60     | 0.61     | 0.61     |
| Environment |                                  | 1.71     | 1.26     | 1.41     | 1.60     | 1.20     | 1.12     | 1.04     | 0.84     | 1.06     |
| EHS         |                                  | 3.33     | 3.17     | 3.23     | 3.14     | 2.92     | 2.92     | 2.79     | 2.65     | 2.91     |

\*BCF: Bioconcentration factor

**Table C4:** Data sources for the primary properties used in the EHS assessment. MSDS stands for Material and Safety Data Sheets

| Primary Property               | Source                                                                                                                                                                  |
|--------------------------------|-------------------------------------------------------------------------------------------------------------------------------------------------------------------------|
| Boiling point                  | Marrero and Gani <sup>20</sup>                                                                                                                                          |
| Flash point                    | MSDS, the US EPA's Toxicity Estimation Software Tool (TEST) V4.1 <sup>96</sup>                                                                                          |
| LD50 <sub>oral</sub>           | MSDS, TEST, Discovery Studio V3.5 <sup>31</sup>                                                                                                                         |
| Oxygen balance                 | Chetah V9.0 <sup>144</sup>                                                                                                                                              |
| LD50 <sub>dermal</sub>         | MSDS                                                                                                                                                                    |
| LC50 aquatic                   | Ecological Structure Activity Relationships (ECOSAR) Class Program V1.0, part of the US EPA's Estimation Program Interface (EPI) Suite <sup>TM</sup> V4.1 <sup>30</sup> |
| Persistence                    | Level III Fugacity model EPI Suite V4.1 <sup>30</sup>                                                                                                                   |
| Bio-concentration factor (BCF) | EPI Suite V4.1 <sup>30</sup>                                                                                                                                            |
| pKa                            | Marvin 6.0.5 <sup>22</sup>                                                                                                                                              |
| IDLH                           | MSDS                                                                                                                                                                    |
| Risk phrases                   | MSDS                                                                                                                                                                    |
| EU Classification              | MSDS                                                                                                                                                                    |

#### Section D: The SAFT- $\gamma$ SW model

The SAFT- $\gamma$  SW<sup>32, 33</sup> equation of state is used in Stage 2 to evaluate solvent performance. It is a molecular-based equation of state where molecules are modelled as chains of fused heteronuclear segments interacting via a variable range potential (here, a square-well potential). Each segment, or group of segments, represents a different chemical moiety or functional group in the molecule. Association sites are added where appropriate to mediate hydrogen-bonding interactions or even chemical aggregation of species<sup>34, 35</sup>. The SAFT- $\gamma$  SW formalism is a generalisation of the SAFT-VR homonuclear approach<sup>36, 37</sup> which has been shown to provide an accurate description of the thermodynamic fluid-phase behaviour of a wide variety of compounds and their mixtures, including mixtures of CO<sub>2</sub>, water and amines<sup>34, 38, 39</sup>. The reformulation of the SAFT-VR EoS within a GC framework, in the form of the SAFT- $\gamma$  SW EoS, increases the predictive capability of the approach significantly. This is due to the underlying assumption (as in any GC approach) that once the parameters for a particular functional group have been determined from regression to experimental data for specific molecules, they can be transferred to other molecules that contain this functional group without any further parameter adjustment. This can be used to predict the fluid-phase behaviour of compounds whose properties have not yet been measured experimentally.

A first step towards the description of multifunctional amines, and their mixtures with water and CO<sub>2</sub>, with the SAFT- $\gamma$  SW EoS was presented in Chremos et al.<sup>40</sup>. It has been extended in subsequent studies<sup>41, 42</sup>. Several strategies have been developed in this previous work to tackle the challenges associated with modelling these complex mixtures in a predictive way. Multifunctional compounds such as alkanolamines present highly polarisable functional groups (e.g., hydroxyl and amine) that can be in close proximity; this can alter the effective interactions of these groups with other molecules. Specialised (higher-order) groups have been developed to account for such proximity effects<sup>40-42</sup>. The reactive nature of the mixtures is modelled implicitly, using strong physical interactions between association sites to mimic the formation of

new species<sup>34, 38, 39, 40-42</sup>. In our current work, we use the SAFT- $\gamma$  SW EoS and the parameters developed in previous works<sup>40-43</sup> to describe aqueous mixtures of selected multifunctional amines with carbon dioxide.

Within SAFT- $\gamma$  SW molecules are modelled as heteronuclear chains, where each segment characterises a given chemical moiety. Dispersion interactions between segments are described via square-well potentials and association sites are used to mimic strong directional interactions such as hydrogen bonds. A given functional group  $k$  is characterised by the number  $\nu_k^*$  of identical segments it comprises, the hard-core diameter  $\sigma_{kk}$  of each segment, the depth  $\epsilon_{kk}$  and range  $\lambda_{kk}$  of the segment-segment dispersion interactions, the depth  $\epsilon_{kkab}^{\text{HB}}$  and the range  $r_{c, kkab}$  of the hydrogen-bonding interactions between association site types  $a$  and  $b$ , and the shape factor  $S_k$  or the degree to which the given functional group contributes to the overall properties of the molecule. The molecular model parameters characterising each functional group have been developed in previous works<sup>40, 41, 43</sup>. In Tables D1, D2 and D3 we summarise the ones used in this work for completeness.

**Table D1:** SAFT- $\gamma$  SW like group parameters (see text for details).  $N_{k,e}$ ,  $N_{k,H}$ ,  $N_{k,\alpha 1}$  and  $N_{k,\alpha 2}$  represent the number of association sites of type e, H,  $\alpha_1$  and  $\alpha_2$ , respectively, on group  $k$ .  $k_B$  is Boltzmann's constant.

| Group                           | $\nu_k^*$ | $S_k$  | $\sigma_{kk} / \text{\AA}$ | $\lambda_{kk}$ | $(\epsilon_{kk}/k_B) / \text{K}$ | $(\epsilon_{kkab}/k_B) / \text{K}$ | $r_{c, kkab} / \text{\AA}$ | $N_{k,e}$ | $N_{k,H}$ | $N_{k,\alpha 1}$ | $N_{k,\alpha 2}$ |
|---------------------------------|-----------|--------|----------------------------|----------------|----------------------------------|------------------------------------|----------------------------|-----------|-----------|------------------|------------------|
| CH <sub>3</sub>                 | 1         | 0.6667 | 3.8105                     | 1.4130         | 252.601                          | -                                  | -                          | -         | -         | -                | -                |
| CH <sub>2</sub>                 | 1         | 0.3333 | 4.0276                     | 1.6606         | 240.482                          | -                                  | -                          | -         | -         | -                | -                |
| CH <sub>2</sub> NH <sub>2</sub> | 1         | 0.9075 | 3.8080                     | 1.4836         | 439.350                          | 1021.375                           | 2.4450                     | 1         | 2         | -                | -                |
| CH <sub>2</sub> NH              | 1         | 0.3600 | 4.8000                     | 1.6200         | 173.605                          | 990.075                            | 2.8302                     | 1         | 1         | -                | -                |
| CH <sub>2</sub> OH              | 1         | 0.5657 | 4.3174                     | 1.6519         | 399.959                          | 2555.721                           | 2.3598                     | 2         | 1         | -                | -                |
| CHOH                            | 1         | 0.8998 | 3.5251                     | 1.2823         | 575.000                          | 1522.668                           | 2.3362                     | 2         | 1         | -                | -                |
| H <sub>2</sub> O                | 1         | 1.0000 | 3.0342                     | 1.7889         | 250.000                          | 1400.000                           | 2.1082                     | 2         | 2         | -                | -                |
| CO <sub>2</sub>                 | 2         | 1.0000 | 2.7865                     | 1.5157         | 179.270                          | -                                  | -                          | -         | -         | 1                | 1                |

**Table D2:** SAFT- $\gamma$  SW unlike group dispersion interaction energies  $\epsilon_{kl}$ . The numbers in brackets correspond to the unlike values of the range  $\lambda_{kl}$ ; in all other cases the combining rule  $\lambda_{ij} = (\lambda_{ii}\sigma_{ii} + \lambda_{jj}\sigma_{jj}) / (\sigma_{ii} + \sigma_{jj})$ , is used. The table is symmetric ( $\epsilon_{kl} = \epsilon_{lk}$ ). The group CH<sub>2</sub>NH<sub>2</sub>[CH<sub>2</sub>OH] refers to a CH<sub>2</sub>NH<sub>2</sub> affected by the presence of a CH<sub>2</sub>OH group bonded to it.

| Group                           | CH <sub>3</sub>    | CH <sub>2</sub>    | CH <sub>2</sub> NH <sub>2</sub> | CH <sub>2</sub> NH <sub>2</sub><br>[CH <sub>2</sub> OH] | CH <sub>2</sub> NH | CH <sub>2</sub> OH | CHOH    | H <sub>2</sub> O |
|---------------------------------|--------------------|--------------------|---------------------------------|---------------------------------------------------------|--------------------|--------------------|---------|------------------|
| CH <sub>3</sub>                 | -                  | -                  | -                               | -                                                       | -                  | -                  | -       | -                |
| CH <sub>2</sub>                 | 261.520            | -                  | -                               | -                                                       | -                  | -                  | -       | -                |
| CH <sub>2</sub> NH <sub>2</sub> | 254.736            | 297.873            | -                               | -                                                       | -                  | -                  | -       | -                |
| CH <sub>2</sub> NH              | 374.600            | 275.940            | 108.707                         | -                                                       | -                  | -                  | -       | -                |
| CH <sub>2</sub> OH              | 279.939            | 283.702            | 143.247                         | 143.247                                                 | 110.247            | -                  | -       | -                |
| CHOH                            | 465.942            | 367.465            | 365.774                         | -                                                       | 138.101            | -                  | -       | -                |
| H <sub>2</sub> O                | 460.312<br>(1.257) | 460.276<br>(1.257) | 286.857<br>(1.740)              | 444.924<br>(1.279)                                      | 369.506<br>(1.800) | 328.263            | 399.643 | -                |
| CO <sub>2</sub>                 | 196.296            | 189.721            | 480.501<br>(1.293)              | 383.850<br>(1.293)                                      | 200.000<br>(1.293) | 245.442            | 318.628 | 224.400          |

**Table D3:** SAFT-  $\gamma$  SW association energies and ranges between the different site types in different groups. The group  $\text{CH}_2\text{NH}_2[\text{CH}_2\text{OH}]$  refers to a  $\text{CH}_2\text{NH}_2$  affected by the presence of a  $\text{CH}_2\text{OH}$  group bonded to it.

| Group<br>(site type)         | $\text{CH}_2\text{NH}_2$ (e) | $\text{CH}_2\text{NH}_2$ (H) | $\text{CH}_2\text{NH}_2$<br>[ $\text{CH}_2\text{OH}$ ] (e) | $\text{CH}_2\text{NH}_2$<br>[ $\text{CH}_2\text{OH}$ ] (H) | $\text{CH}_2\text{NH}$ (e) | $\text{CH}_2\text{NH}$ (H) | $\text{CH}_2\text{OH}$ (e) | $\text{CH}_2\text{OH}$ (H) | $\text{CHOH}$ (e)    | $\text{CHOH}$ (H)    |
|------------------------------|------------------------------|------------------------------|------------------------------------------------------------|------------------------------------------------------------|----------------------------|----------------------------|----------------------------|----------------------------|----------------------|----------------------|
| $\text{CH}_2\text{OH}$ (e)   | -                            | 1696.979<br>(2.5282)         | -                                                          | 1696.979<br>(2.5282)                                       | -                          | 1883.891<br>(3.4281)       | -                          | -                          | -                    | -                    |
| $\text{CH}_2\text{OH}$ (H)   | 903.303<br>(3.9520)          | -                            | 903.303<br>(3.9520)                                        | -                                                          | 1471.500<br>(2.9028)       | -                          | -                          | -                          | -                    | -                    |
| $\text{CH}_2\text{NH}$ (e)   | -                            | -                            | -                                                          | -                                                          | -                          | -                          | -                          | 1471.500<br>(2.9028)       | -                    | 808.014<br>(3.3209)  |
| $\text{CH}_2\text{NH}$ (H)   | -                            | -                            | -                                                          | -                                                          | -                          | -                          | 1883.891<br>(3.4281)       | -                          | 750.256<br>(3.3151)  | -                    |
| $\text{H}_2\text{O}$ (e)     | -                            | 1365.326<br>(2.3082)         | -                                                          | 1365.326<br>(2.3082)                                       | -                          | 1500.178<br>(2.4300)       | -                          | 1905.280<br>(2.4669)       | -                    | 1040.175<br>(2.4500) |
| $\text{H}_2\text{O}$ (H)     | 1261.968<br>(2.5200)         | -                            | 1261.968<br>(2.5200)                                       | -                                                          | 1380.930<br>(2.4100)       | -                          | 2122.971<br>(2.0186)       | -                          | 1070.150<br>(2.5500) | -                    |
| $\text{CO}_2$ ( $\alpha_1$ ) | 4175.000<br>(1.9699)         | -                            | 4875.734<br>(1.9699)                                       | -                                                          | 3375.000<br>(2.2199)       | -                          | -                          | -                          | -                    | -                    |
| $\text{CO}_2$ ( $\alpha_2$ ) | 4870.194<br>(1.9790)         | -                            | 5175.024<br>(1.9790)                                       | -                                                          | 4475.000<br>(2.2500)       | -                          | -                          | -                          | -                    | -                    |

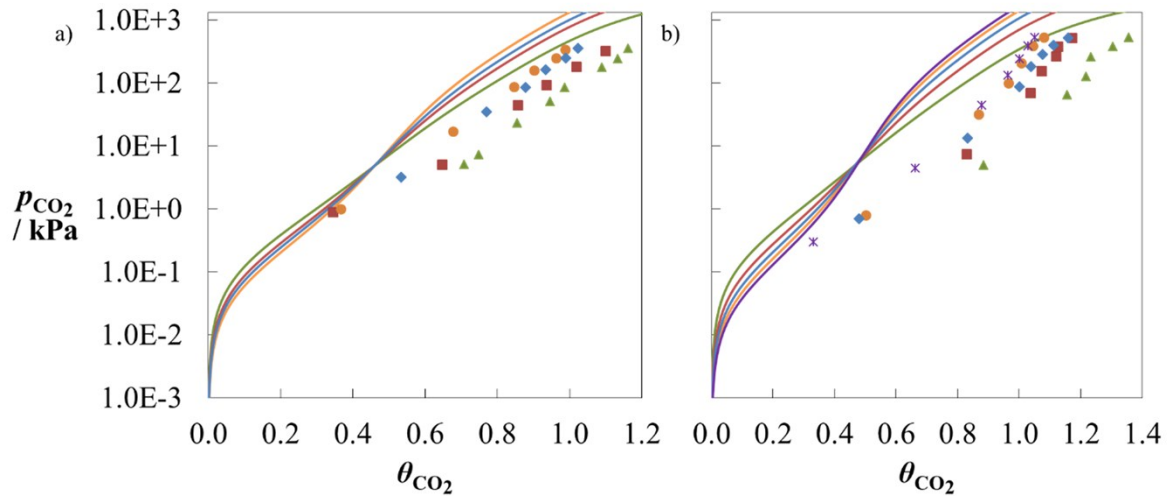

**Figure D1:** Solubility of  $\text{CO}_2$  in aqueous solutions of (a) MMEA and (b) EMEA at 303.1 K represented as mole fraction of  $\text{CO}_2$  as a function of the partial pressure along the vapour-liquid equilibrium of the ternary mixture (a) MMEA +  $\text{H}_2\text{O}$  +  $\text{CO}_2$  or (b) EMEA +  $\text{H}_2\text{O}$  +  $\text{CO}_2$ . The solubility is represented as  $\text{CO}_2$  loading  $\theta_{\text{CO}_2}$ , defined as the moles of  $\text{CO}_2$  absorbed in the liquid phase per mole of amine in the liquid. The symbols correspond to (a) experimental data<sup>44, 45</sup> for aqueous solutions of MMEA of various weight percentages in mass: 6.8 wt% (green), 11 wt% (red), 14 wt% (blue) and 19 wt% (orange), and to (b) experimental data<sup>46</sup> for aqueous solutions of EMEA of various weight percentages in mass: 6 wt% (green), 12 wt% (red), 18 wt% (blue) and 24 wt% (orange) and 30 wt% (purple). The solid curves correspond to SAFT- $\gamma$  SW calculations for the same percentages.

## Section E: Data for reported solvents

**Table E1:** Names, abbreviations, CAS numbers and literature sources of the amines contained in the Reference (R) class.

| ID  | Name                              | Abbrev. | CAS Registry Number | Source                            |
|-----|-----------------------------------|---------|---------------------|-----------------------------------|
| R1  | 2-(Amino)-propanol                | 2AP     | 6168-72-5           | Da Silva <sup>47</sup>            |
| R2  | 2-Amino-2-methyl-1-propanol       | AMP     | 124-68-5            | Harbou et al. <sup>48</sup>       |
| R3  | 2-(Methylamino)-ethanol           | MMEA    | 109-83-1            | Ma'mun et al. <sup>49</sup>       |
| R4  | Ethylaminoethanol                 | EMEA    | 110-73-6            | Kumar et al. <sup>50</sup>        |
| R5  | 2-(Butylamino) ethanol            | BEA     | 111-75-1            | Yamada et al. <sup>2</sup>        |
| R6  | N,N-Dimethylaminoethanol          | DMMEA   | 108-01-0            | Tong <sup>51</sup>                |
| R7  | N,N-Diethyl-2-aminoethanol        | DEEA    | 100-37-8            | Sutar et al. <sup>52</sup>        |
| R8  | 3-Amino-1-propanol                | MPA     | 156-87-6            | Henni et al. <sup>53</sup>        |
| R9  | 4-Diethylamino-2-butanol          | DEAB    | 5467-48-1           | Sema et al. <sup>54</sup>         |
| R10 | N-(2-aminoethyl) ethanolamine     | AEEA    | 111-41-1            | Stec et al. <sup>55</sup>         |
| R11 | Diethanolamine                    | DEA     | 111-42-2            | Oexmann <sup>56</sup>             |
| R12 | Diethylenetriamine                | DETA    | 111-40-0            | Kim and Svendsen <sup>57</sup>    |
| R13 | Diisopropanolamine                | DIPO    | 110-97-4            | Oexmann <sup>56</sup>             |
| R14 | Ethylenediamine                   | EDA     | 107-15-3            | Bishnoi <sup>58</sup>             |
| R15 | N-Methyl-1,3-propanediamine       | MAPA    | 6291-84-5           | Kim and Svendsen <sup>57</sup>    |
| R16 | Methyldiethanolamine              | MDEA    | 105-59-9            | Kim and Svendsen <sup>57</sup>    |
| R17 | Monoethanolamine                  | MEA     | 141-43-5            | Oexmann <sup>56</sup>             |
| R18 | 1,2-Propanediamine                | MEDA    | 78-90-0             | Rochelle <sup>59</sup>            |
| R19 | Tetraethylenepentamine            | TEPA    | 112-57-2            | Aronu et al. <sup>60</sup>        |
| R20 | Triethanolamine                   | TEA     | 102-71-6            | Vertseeg et al. <sup>61</sup>     |
| R21 | Triisopropanolamine               | TIPA    | 122-20-3            | Chahuan et al. <sup>62</sup>      |
| R22 | Tromethamine                      | TRIS    | 77-86-1             | Penders et al. <sup>63</sup>      |
| R23 | 2-Amino-2-methyl-1,3-propanediol  | AMPD    | 115-69-5            | Penders et al. <sup>63</sup>      |
| R24 | 2-Amino-2-ethyl-1,3-propanediol   | AEPD    | 115-70-8            | Baek and Yoon <sup>64</sup>       |
| R25 | 3-(Dimethylamino)-1,2-propanediol | DMAPD   | 623-57-4            | Lijima and Mitsuoka <sup>65</sup> |

**Table E2:** Names, abbreviations, CAS numbers and literature sources of the amines selected from the Commercial (C) class. The amines were obtained from an in-house data repository at ETH Zurich, publicly available databases <sup>67, 67</sup> and the commercial catalogue of Sigma-Aldrich<sup>68</sup>.

| ID  | Name                                       | Abbrev. | CAS Registry Number | Source                                                        |
|-----|--------------------------------------------|---------|---------------------|---------------------------------------------------------------|
| C1  | 2-Amino-1-butanol                          | 2A1B    | 96-20-8             | Rooney <sup>69</sup>                                          |
| C2  | 2-Amino-1-pentanol                         | 2A1PN   | 4146-04-7           | Rooney <sup>69</sup>                                          |
| C3  | 2-Amino-1-hexanol                          | 2A1H    | 5665-74-7           | Rooney <sup>69</sup>                                          |
| C4  | 2-Propylamino-ethanol                      | PAE     | 16369-21-4          | Yamada et al. <sup>70</sup>                                   |
| C5  | 1-Methylamino-propan-2-ol                  | 1M2P    | 16667-45-1          | -                                                             |
| C6  | 2-(Isopropylamino)-ethanol                 | IPAE    | 109-56-8            | Yamada et al. <sup>70</sup>                                   |
| C7  | Diisobutylamine                            | DIBA    | 626-23-3            | Zhang et al. <sup>71, 72</sup>                                |
| C8  | Di-sec butylamine                          | DsBA    | 110-96-3            | Zhang et al. <sup>71, 72</sup>                                |
| C9  | Di-N-Propylethylamine                      | DPE     | 20634-92-8          | -                                                             |
| C10 | 4-Amino-2-butanol                          | 4A2B    | 39884-48-5          | -                                                             |
| C11 | Di-N-butylamine                            | DBA     | 111-92-2            | Zhang et al. <sup>71</sup>                                    |
| C12 | 3-(Diethyl-amino)-propanol                 | 3DAP    | 622-93-5            | -                                                             |
| C13 | N,N Diethyl-1-butanamine                   | ND1B    | 4444-68-2           | -                                                             |
| C14 | 1-Ethyl-N,N-dimethylbutylamine             | 1EDB    | 24552-03-2          | -                                                             |
| C15 | N,N,N',N'-Tetramethyl-1,2-ethanediamine    | TMEDA   | 110-18-9            | Bouzina et al. <sup>73</sup>                                  |
| C16 | N,N,N',N',2-Pentamethyl-1,2-propanediamine | 2P12P   | 68367-53-3          | -                                                             |
| C17 | 4-Amino-pentanol                           | 4AP     | 927-55-9            | -                                                             |
| C18 | 5-Amino-pentanol                           | 5AP     | 2508-29-4           | Singh et al. <sup>6, 7, 74</sup>                              |
| C19 | Hexanamine                                 | HEXA    | 111-26-2            | Zhang et al. <sup>71</sup> ;<br>Singh et al. <sup>6, 74</sup> |
| C20 | 4-(Dimethylamino)-1-butanol                | 4D1B    | 13330-96-6          | -                                                             |

**Table E3:** Names and CAS numbers amines C21-C60 in the Commercial (C) class. The amines were obtained from an in-house data repository at ETH Zurich, publicly available databases <sup>66, 67</sup> and the commercial catalogue of Sigma-Aldrich<sup>68</sup>.

| ID  | Name                                                       | CAS Registry Number | ID  | Name                                                                | CAS Registry Number |
|-----|------------------------------------------------------------|---------------------|-----|---------------------------------------------------------------------|---------------------|
| C21 | 3-Methyl-3-(N-methyl-N-isopropyl)amin-2-butanol            | 64037-42-9          | C41 | 2-Methylundecan-2-amine                                             | 110-10-1            |
| C22 | 1-amino-2,2-dimethylpropan-1-ol                            | 40898-98-4          | C42 | 2-Methyl-6-methylamino-2-heptanol                                   | 17086-16-7          |
| C23 | N'-butyl-2-methyl-1,2-propanediamine                       | 50540-24-4          | C43 | (2-Amino-2-methylpropyl)(propan-2-yl)amine                          | 5448-29-3           |
| C24 | N-(3-hydroxypropyl)-1,2-propanediamine,                    | 10171-78-5          | C44 | N-Methyl-N,1,1-triethyl-propylamine                                 | 33326-98-6          |
| C25 | 2,2-dimethyl-1,3-propanediamine,                           | 7328-91-8           | C45 | 2-[(Octan-2-yl)amino]ethan-1-ol                                     | 26535-68-2          |
| C26 | 1,3-Butanediamine                                          | 590-88-5            | C46 | 1-(N,N-dimethyl)-1,2-Butanediamine                                  | 63732-18-3          |
| C27 | N,N,2,2-tetramethyl-1,3-propanediamine                     | 53369-71-4          | C47 | Ethyl(methyl)(2,3,3-trimethylbutan-2-yl)amine                       | -                   |
| C28 | Dimethyl(2,3,3-trimethylbutan-2-yl)amine                   | 29773-01-1          | C48 | (3-Aminopropyl)(octyl)amine                                         | 7173-57-1           |
| C29 | N,N,N,N-tetramethyl-1,3-butanediamine                      | 97-84-7             | C49 | 2-[(3-Aminopropyl)(methyl)amino] ethan-1-ol                         | 41999-70-6          |
| C30 | (3-Amino-2-methylpropyl)dimethylamine                      | 6105-72-2           | C50 | (4-Aminobutyl)diethylamine                                          | 27431-62-5          |
| C31 | 6-Amino-2-methyl-2-heptanol                                | 372-66-7            | C51 | N,N,N'-triethyl-1,2-Ethanediamine                                   | 105-04-4            |
| C32 | 4,5-Dimethylheptane-1,6-diamine                            | 25620-58-0          | C52 | 2-{[3-(Dimethylamino)propyl](2-methylpropyl)amino} ethan-1-ol       | 78718-56-6          |
| C33 | 1-Amino-2-methylbutan-2-ol                                 | 51411-49-5          | C53 | (4-Methylpentan-2-yl)( {2-[(4-methylpentan-2-yl)amino]ethyl} )amine | -                   |
| C34 | 2,4-Dimethyl-3- pentanamine                                | 4083-57-2           | C54 | 2-[(4-aminopentyl)(ethyl)amino] ethan-1-ol                          | 69559-11-1          |
| C35 | 1-Amino-3-diethylamino-propan-2-ol                         | 6322-06-1           | C55 | 2-Undecanamine                                                      | 13205-56-6          |
| C36 | Ethyl(3-methylpentan-3-yl)amine                            | 1185-93-9           | C56 | N-(2-Aminoethyl)-N,N'-dimethyl-1,2-ethanediamine                    | -                   |
| C37 | 2-Amino-2-methyl-3-hexanol                                 | 63765-79-7          | C57 | N2,N2-dimethyl-1,2-propanediamine                                   | 19764-58-0          |
| C38 | 2-{[3-(dimethylamino)-2,2-dimethylpropyl]amino} ethan-1-ol | 84642-65-9          | C58 | 1-(Decylamino)propan-2-ol                                           | 68603-41-8          |
| C39 | 3,3-Dimethyl butylamine                                    | 15673-00-4          | C59 | N,N-diethyl-1-dodecanamine                                          | 4271-27-6           |
| C40 | (4-Aminopentyl)diethylamine                                | 140-80-7            | C60 | 2-[(1-Hydroxypropan-2-yl)(methyl)amino]propan-1-ol                  | 56684-95-8          |



**Table E4:** Names and CAS numbers amines C61-C101 in the Commercial (C) class. The amines were obtained from an in-house data repository at ETH Zurich, publicly available databases<sup>66, 67</sup> and the commercial catalogue of Sigma-Aldrich<sup>68</sup>.

| ID  | Name                             | CAS Registry Number | ID   | Name                                             | CAS Registry Number |
|-----|----------------------------------|---------------------|------|--------------------------------------------------|---------------------|
| C61 | 1,1-Dimethyl-2-pentyl-hydrazine  | 67398-36-1          | C82  | N-octyl-1-octanamine                             | 1120-48-5           |
| C62 | N-(1-methylethyl)-1-butanamine   | 39099-23-5          | C83  | N,N-dipentyl-1-pentanamine                       | 621-77-2            |
| C63 | N,N-dipropyl-1-Propanamine       | 102-69-2            | C84  | N-methyl-N-(N,N-dimethylaminoethyl)-aminoethanol | 2212-32-0           |
| C64 | N-methyl-1-octanamine            | 2439-54-5           | C85  | N,N-Diethyl-2-aminoethanol                       | 100-37-8            |
| C65 | N,N-dimethyl-1,3-propanediamine  | 109-55-7            | C86  | 1,3-bis(Dimethylamino)-2-propanol                | 5966-51-8           |
| C66 | 1-Nonanamine                     | 112-20-9            | C87  | 1,8-Diaminooctane                                | 373-44-4            |
| C67 | 1-Octanamine                     | 111-86-4            | C88  | 1,7-Diaminoheptane                               | 646-19-5            |
| C68 | 1-Decanamine                     | 2016-57-1           | C89  | 1,6-Hexanediamine                                | 124-09-4            |
| C69 | 1-Heptanamine                    | 111-68-2            | C90  | 1,5-Pentanediamine                               | 462-94-2            |
| C70 | N-pentyl-1-pentanamine           | 2050-92-2           | C91  | 1,4-Butanediamine                                | 110-60-1            |
| C71 | 2-Dimethylamino-2-methylpropanol | 7005-47-2           | C92  | 1,3-Propanediamine                               | 109-76-2            |
| C72 | 1-Dodecanamine                   | 124-22-1            | C93  | 1-Amino-2-propanol                               | 78-96-6             |
| C73 | 2-Methyl-1,2-propanediamine      | 811-93-8            | C94  | 5-Amino-2,2-dimethylpentanol                     | 13532-77-9          |
| C74 | N-hexyl-1-Hexanamine             | 143-16-8            | C95  | 6-Amino-1-hexanol                                | 4048-33-3           |
| C75 | 2-Amino-3-methyl-1-butanol       | 16369-05-4          | C96  | 4-Amino-1-butanol                                | 13325-10-5          |
| C76 | (Diisopropylamino)ethanol        | 96-80-0             | C97  | 2-Amino-1,3-propanediol                          | 534-03-2            |
| C77 | Tributylamine                    | 102-82-9            | C98  | 3-(Diethylamino)-1,2-propanediol                 | 621-56-7            |
| C78 | N,N-dimethyl-1-decanamine        | 1120-24-7           | C99  | Ethyl-diethanolamine                             | 139-87-7            |
| C79 | 3-(Dimethylamino)-1-propanol     | 3179-63-3           | C100 | 2,2'-(Butylimino)bis-ethanol,                    | 102-79-4            |
| C80 | 1-(Dimethylamino)-2-propanol     | 108-16-7            | C101 | 3-Methylamino-1,2-propanediol                    | 40137-22-2          |
| C81 | 2-(tert-Butylamino)ethanol       | 4620-70-6           | -    | -                                                | -                   |

**Table E5:** Molecular structures obtained from CAMD in D class (D1-D78).

| ID  | Groups in molecule                                                                                   | Frequency of groups | ID  | Groups in molecule                                                                                        | Frequency of groups |
|-----|------------------------------------------------------------------------------------------------------|---------------------|-----|-----------------------------------------------------------------------------------------------------------|---------------------|
| D1  | [-CH <sub>3</sub> ,>CH <sub>2</sub> ,>C-NH <sub>2</sub> ,>CH <sub>2</sub> -NH-,>CH <sub>2</sub> -N<] | [4 1 1 1 1]         | D40 | [-CH <sub>3</sub> ,>CH <sub>2</sub> ,>OH,>CH <sub>2</sub> -N<]                                            | [1 2 2 1]           |
| D2  | [-CH <sub>3</sub> ,>CH <sub>2</sub> ,>C<,>OH,>C-NH <sub>2</sub> ]                                    | [4 1 1 1 1]         | D41 | [-CH <sub>3</sub> ,>CH <sub>2</sub> ,>OH,>CH-NH <sub>2</sub> ]                                            | [1 1 1 2]           |
| D3  | [-CH <sub>3</sub> ,>CH <sub>2</sub> ,>C-NH <sub>2</sub> ,>CH <sub>2</sub> -NH-,CH <sub>3</sub> -N<]  | [3 1 1 1 1]         | D42 | [>CH <sub>2</sub> ,>OH,CH <sub>3</sub> -NH-,>CH <sub>2</sub> -NH-]                                        | [2 1 1 1]           |
| D4  | [-CH <sub>3</sub> ,>CH <sub>2</sub> ,>C-NH <sub>2</sub> ,>CH <sub>2</sub> -NH-]                      | [3 2 1 2]           | D43 | [-CH <sub>3</sub> ,>CH-,>OH,>CH-NH-]                                                                      | [2 1 2 1]           |
| D5  | [-CH <sub>3</sub> ,>CH <sub>2</sub> ,>C-NH <sub>2</sub> ,CH <sub>3</sub> -NH-,>CH <sub>2</sub> -NH-] | [2 1 1 1 1]         | D44 | [-CH <sub>3</sub> ,>CH <sub>2</sub> ,>OH,CH <sub>3</sub> -N<,>CH <sub>2</sub> -N<]                        | [1 1 2 1 1]         |
| D6  | [-CH <sub>3</sub> ,>CH <sub>2</sub> ,>CH-,>CH <sub>2</sub> -NH-,>CH <sub>2</sub> -N<]                | [5 1 1 1 2]         | D45 | [>CH <sub>2</sub> ,>OH,CH <sub>3</sub> -NH-,>CH <sub>2</sub> -NH-,CH <sub>3</sub> -N<]                    | [1 1 1 1 1]         |
| D7  | [-CH <sub>3</sub> ,>CH <sub>2</sub> ,>CH-,>OH,>C-NH <sub>2</sub> ]                                   | [3 2 1 1 1]         | D46 | [-CH <sub>3</sub> ,>CH <sub>2</sub> ,>OH,>C-NH <sub>2</sub> ,CH <sub>3</sub> -NH-]                        | [1 2 1 1 1]         |
| D9  | [-CH <sub>3</sub> ,>OH,>C-NH <sub>2</sub> ,>CH <sub>2</sub> -NH-]                                    | [2 1 1 1]           | D47 | [-CH <sub>3</sub> ,>CH-,>OH,>C-NH <sub>2</sub> ,CH <sub>3</sub> -NH-]                                     | [2 1 1 1 1]         |
| D9  | [-CH <sub>3</sub> ,>CH <sub>2</sub> ,>OH,>CH <sub>2</sub> -NH-]                                      | [1 2 1 2]           | D48 | [-CH <sub>3</sub> ,>OH,CH <sub>3</sub> -N<,>CH <sub>2</sub> -N<]                                          | [1 2 2 1]           |
| D10 | [-CH <sub>3</sub> ,>CH <sub>2</sub> ,>OH,>C-NH <sub>2</sub> ,>CH <sub>2</sub> -NH-]                  | [2 1 1 1 1]         | D49 | [-CH <sub>3</sub> ,>OH,>CH <sub>2</sub> -NH-,CH <sub>3</sub> -N<]                                         | [1 1 1 2]           |
| D11 | [-OH,>CH-NH <sub>2</sub> ]                                                                           | [2 1]               | D50 | [-CH <sub>3</sub> ,>CH <sub>2</sub> ,>OH,>C-NH <sub>2</sub> ,CH <sub>3</sub> -N<]                         | [2 1 1 1 1]         |
| D12 | [-OH,>CH <sub>2</sub> -NH-]                                                                          | [2 1]               | D51 | [-CH <sub>3</sub> ,>CH <sub>2</sub> ,>OH,>CH <sub>2</sub> -NH-,>CH <sub>2</sub> -N<]                      | [1 1 2 1 1]         |
| D13 | [-CH <sub>3</sub> ,>OH,>C-NH <sub>2</sub> ]                                                          | [1 2 1]             | D52 | [-CH <sub>3</sub> ,>CH <sub>2</sub> ,>C<,>OH,CH <sub>3</sub> -N<]                                         | [2 1 1 2 1]         |
| D14 | [>CH <sub>2</sub> ,>OH,>CH-NH <sub>2</sub> ]                                                         | [1 2 1]             | D53 | [-CH <sub>3</sub> ,>CH <sub>2</sub> ,>C-NH <sub>2</sub> ,CH <sub>3</sub> -NH-]                            | [1 1 1 2]           |
| D15 | [-OH,CH <sub>3</sub> -N<]                                                                            | [2 2]               | D54 | [-CH <sub>3</sub> ,>OH,>C-NH <sub>2</sub> ,CH <sub>3</sub> -N<]                                           | [2 1 1 2]           |
| D16 | [>CH <sub>2</sub> ,>OH,>CH <sub>2</sub> -NH-]                                                        | [1 2 1]             | D55 | [-CH <sub>3</sub> ,>CH <sub>2</sub> ,>CH-,>OH,CH <sub>3</sub> -N<]                                        | [1 2 1 2 1]         |
| D17 | [-OH,>CH <sub>2</sub> -NH-,CH <sub>3</sub> -N<]                                                      | [2 1 1]             | D56 | [-CH <sub>3</sub> ,>OH,>CH <sub>2</sub> -NH-,CH <sub>3</sub> -N<]                                         | [1 1 2 1]           |
| D18 | [-CH <sub>3</sub> ,>OH,>C-NH <sub>2</sub> ,CH <sub>3</sub> -NH-]                                     | [1 1 1 1]           | D57 | [-CH <sub>3</sub> ,>CH <sub>2</sub> ,>CH-,>OH,>CH <sub>2</sub> -NH-]                                      | [1 2 1 2 1]         |
| D19 | [>CH <sub>2</sub> ,>CH-,>OH,CH <sub>3</sub> -NH-]                                                    | [1 1 2 1]           | D58 | [-CH <sub>3</sub> ,>CH-,>OH,>CH <sub>2</sub> -NH-]                                                        | [2 2 2 1]           |
| D20 | [>CH <sub>2</sub> ,>OH,CH <sub>3</sub> -N<]                                                          | [2 2 1]             | D59 | [-CH <sub>3</sub> ,>OH,>C-NH <sub>2</sub> ,>CH <sub>2</sub> -N<]                                          | [3 1 1 1]           |
| D21 | [>CH <sub>2</sub> ,>OH,>CH-NH <sub>2</sub> ]                                                         | [2 2 1]             | D60 | [>CH <sub>2</sub> ,>OH,>CH-NH <sub>2</sub> ,CH <sub>3</sub> -NH-]                                         | [3 1 1 1]           |
| D22 | [-CH <sub>3</sub> ,>CH-,>OH,CH <sub>3</sub> -N<]                                                     | [1 1 2 1]           | D61 | [-CH <sub>3</sub> ,>CH <sub>2</sub> ,>CH-,>OH,>CH <sub>2</sub> -N<]                                       | [2 1 1 2 1]         |
| D23 | [-CH <sub>3</sub> ,>CH-,>OH,>CH-NH <sub>2</sub> ]                                                    | [1 1 2 1]           | D62 | [>CH <sub>2</sub> ,>OH,CH <sub>3</sub> -NH-,>CH <sub>2</sub> -NH-]                                        | [3 1 1 1]           |
| D24 | [>CH <sub>2</sub> ,>OH,CH <sub>3</sub> -N<]                                                          | [1 2 2]             | D63 | [-CH <sub>3</sub> ,>CH <sub>2</sub> ,>OH,>CH-NH <sub>2</sub> ,CH <sub>3</sub> -N<]                        | [1 1 1 1 2]         |
| D25 | [>CH <sub>2</sub> ,>OH,>CH <sub>2</sub> -NH-]                                                        | [2 2 1]             | D64 | [-CH <sub>3</sub> ,>CH <sub>2</sub> ,>OH,CH <sub>3</sub> -N<,>CH <sub>2</sub> -N<]                        | [1 2 2 1 1]         |
| D26 | [-CH <sub>3</sub> ,>CH-,>OH,>CH <sub>2</sub> -NH-]                                                   | [1 1 2 1]           | D65 | [-CH <sub>3</sub> ,>CH-,>OH,CH <sub>3</sub> -N<,>CH <sub>2</sub> -N<]                                     | [2 1 2 1 1]         |
| D27 | [-CH <sub>3</sub> ,>CH <sub>2</sub> ,>OH,>CH-NH-]                                                    | [1 1 2 1]           | D66 | [-CH <sub>3</sub> ,>CH <sub>2</sub> ,>OH,>CH-NH <sub>2</sub> ,>CH <sub>2</sub> -NH-]                      | [1 2 1 1 1]         |
| D28 | [-CH <sub>3</sub> ,>OH,CH <sub>3</sub> -N<,>CH <sub>2</sub> -N<]                                     | [1 2 1 1]           | D67 | [-CH <sub>3</sub> ,>CH-,>OH,CH <sub>3</sub> -NH-,>CH <sub>2</sub> -NH-,CH <sub>3</sub> -N<]               | [1 1 1 1 1 1]       |
| D29 | [-CH <sub>3</sub> ,>CH <sub>2</sub> ,>OH,>C-NH <sub>2</sub> ,CH <sub>3</sub> -NH-]                   | [1 1 1 1 1]         | D68 | [>CH <sub>2</sub> ,>OH,CH <sub>3</sub> -NH-,>CH <sub>2</sub> -N<]                                         | [2 1 2 1]           |
| D30 | [-CH <sub>3</sub> ,>OH,>CH <sub>2</sub> -NH-,>CH <sub>2</sub> -N<]                                   | [1 2 1 1]           | D69 | [-CH <sub>3</sub> ,>CH <sub>2</sub> ,>OH,>CH <sub>2</sub> -NH-,CH <sub>3</sub> -N<]                       | [1 1 1 1 2]         |
| D31 | [>CH <sub>2</sub> ,>CH-,>OH,CH <sub>3</sub> -NH-]                                                    | [2 1 2 1]           | D70 | [-CH <sub>3</sub> ,>CH <sub>2</sub> ,>OH,>C-NH <sub>2</sub> ,CH <sub>3</sub> -N<]                         | [2 2 1 1 1]         |
| D32 | [-CH <sub>3</sub> ,>C<,>OH,CH <sub>3</sub> -N<]                                                      | [2 1 2 1]           | D71 | [-CH <sub>3</sub> ,>CH <sub>2</sub> ,>C-NH <sub>2</sub> ,CH <sub>3</sub> -NH-]                            | [1 2 1 2]           |
| D33 | [-CH <sub>3</sub> ,>CH <sub>2</sub> ,>CH-,>OH,CH <sub>3</sub> -N<]                                   | [1 1 1 2 1]         | D72 | [-CH <sub>3</sub> ,>CH <sub>2</sub> ,>OH,>C-NH <sub>2</sub> ,CH <sub>3</sub> -N<]                         | [2 1 1 1 2]         |
| D34 | [>CH <sub>2</sub> ,>OH,CH <sub>3</sub> -N<]                                                          | [2 2 2]             | D73 | [-CH <sub>3</sub> ,>CH-,>C-NH <sub>2</sub> ,CH <sub>3</sub> -NH-]                                         | [2 1 1 2]           |
| D35 | [-CH <sub>3</sub> ,>CH-,>OH,CH <sub>3</sub> -N<]                                                     | [1 1 2 2]           | D74 | [-CH <sub>3</sub> ,>CH <sub>2</sub> ,>CH-,>OH,CH <sub>3</sub> -N<]                                        | [2 1 2 2 1]         |
| D36 | [>CH <sub>2</sub> ,>OH,>CH <sub>2</sub> -NH-]                                                        | [3 2 1]             | D75 | [-CH <sub>3</sub> ,>CH <sub>2</sub> ,>OH,>CH <sub>2</sub> -N<]                                            | [2 1 2 2]           |
| D37 | [-CH <sub>3</sub> ,>CH <sub>2</sub> ,>CH-,>OH,>CH <sub>2</sub> -NH-]                                 | [1 1 1 2 1]         | D76 | [-CH <sub>3</sub> ,>CH <sub>2</sub> ,>OH,>CH <sub>2</sub> -NH-,CH <sub>3</sub> -N<]                       | [1 1 1 2 1]         |
| D38 | [>CH <sub>2</sub> ,>OH,>CH-NH <sub>2</sub> ,CH <sub>3</sub> -NH-]                                    | [2 1 1 1]           | D77 | [-CH <sub>3</sub> ,>CH-,>OH,>C-NH <sub>2</sub> ,>CH <sub>2</sub> -NH-]                                    | [3 1 1 1 1]         |
| D39 | [>CH <sub>2</sub> ,>OH,>CH <sub>2</sub> -NH <sub>2</sub> ,CH <sub>3</sub> -N<]                       | [1 1 1 2]           | D78 | [-CH <sub>3</sub> ,>CH <sub>2</sub> ,>OH,CH <sub>3</sub> -NH-,>CH <sub>2</sub> -NH-,>CH <sub>2</sub> -N<] | [1 1 1 1 1 1]       |

**Table E6:** Molecular structures obtained from CAMD in D class (D79-D157).

| ID   | Groups in molecule                                                                                               | Frequency of groups | ID   | Groups in molecule                                                                                                      | Frequency of groups |
|------|------------------------------------------------------------------------------------------------------------------|---------------------|------|-------------------------------------------------------------------------------------------------------------------------|---------------------|
| D79  | [>CH <sub>2</sub> ,>CH,-OH,CH <sub>3</sub> -NH-]                                                                 | [3 1 1 2]           | D119 | [-CH <sub>3</sub> ,>CH <sub>2</sub> ,>C-NH <sub>2</sub> ,CH <sub>2</sub> -NH-]                                          | [3 1 1 2]           |
| D80  | [-CH <sub>3</sub> ,>CH <sub>2</sub> ,>CH,-OH,-CH <sub>2</sub> -NH-]                                              | [2 1 2 2 1]         | D120 | [-CH <sub>3</sub> ,>CH <sub>2</sub> ,>OH,->C-NH <sub>2</sub> ,CH <sub>3</sub> -N<]                                      | [2 4 1 1 1]         |
| D81  | [-CH <sub>3</sub> ,>CH <sub>2</sub> ,>OH,->C-NH <sub>2</sub> ,CH <sub>2</sub> -N<]                               | [3 1 1 1 1]         | D121 | [-CH <sub>3</sub> ,>CH <sub>2</sub> ,>CH,-OH,->C-NH <sub>2</sub> ,CH <sub>3</sub> -N<]                                  | [3 2 1 1 1 1]       |
| D82  | [-CH <sub>3</sub> ,>C-NH <sub>2</sub> ,CH <sub>3</sub> -NH-,CH <sub>3</sub> -N<]                                 | [2 1 1 2]           | D122 | [-CH <sub>3</sub> ,>CH <sub>2</sub> ,>OH,-CH <sub>2</sub> -NH-]                                                         | [1 4 1 2]           |
| D83  | [-CH <sub>3</sub> ,>OH,>CH-NH <sub>2</sub> ,CH <sub>2</sub> -NH-,CH <sub>2</sub> -N<]                            | [2 1 1 1 1]         | D123 | [-CH <sub>3</sub> ,>CH <sub>2</sub> ,>CH,-OH,-CH <sub>2</sub> -NH-]                                                     | [2 2 1 1 2]         |
| D84  | [-CH <sub>3</sub> ,>CH <sub>2</sub> ,>CH,-OH,>CH-NH <sub>2</sub> ,CH <sub>3</sub> -NH-]                          | [1 2 1 1 1 1]       | D124 | [-CH <sub>3</sub> ,>C-NH <sub>2</sub> ,CH <sub>3</sub> -NH-,CH <sub>2</sub> -NH-,CH <sub>2</sub> -N<]                   | [3 1 1 1 1]         |
| D85  | [-CH <sub>3</sub> ,>CH <sub>2</sub> ,>C<,-OH,-CH <sub>2</sub> -N<]                                               | [3 1 1 2 1]         | D125 | [-CH <sub>3</sub> ,>CH <sub>2</sub> ,>CH,->C-NH <sub>2</sub> ,CH <sub>3</sub> -NH-]                                     | [2 2 1 1 2]         |
| D86  | [>CH <sub>2</sub> ,>OH,CH <sub>3</sub> -NH-,CH <sub>3</sub> -N<]                                                 | [3 1 1 2]           | D126 | [-CH <sub>3</sub> ,>CH <sub>2</sub> ,>CH-NH <sub>2</sub> ,>C-NH <sub>2</sub> ,CH <sub>3</sub> -N<]                      | [3 2 1 1 1]         |
| D87  | [-CH <sub>3</sub> ,>OH,->C-NH <sub>2</sub> ,CH <sub>3</sub> -N<,-CH <sub>2</sub> -N<]                            | [3 1 1 1 1]         | D127 | [-CH <sub>3</sub> ,>CH <sub>2</sub> ,>OH,->C-NH <sub>2</sub> ,CH <sub>2</sub> -N<]                                      | [3 3 1 1 1]         |
| D88  | [-CH <sub>3</sub> ,>CH <sub>2</sub> ,>CH,-OH,-CH <sub>2</sub> -N<]                                               | [2 2 1 2 1]         | D128 | [-CH <sub>3</sub> ,>CH <sub>2</sub> ,>C-NH <sub>2</sub> ,CH <sub>3</sub> -NH-,CH <sub>3</sub> -N<]                      | [2 2 1 1 2]         |
| D89  | [-CH <sub>3</sub> ,>OH,-CH <sub>2</sub> -NH-,CH <sub>2</sub> -N<]                                                | [2 1 2 1]           | D129 | [-CH <sub>3</sub> ,>CH <sub>2</sub> ,>CH,-OH,->C-NH <sub>2</sub> ,CH <sub>2</sub> -N<]                                  | [4 1 1 1 1 1]       |
| D90  | [>CH <sub>2</sub> ,>OH,CH <sub>3</sub> -NH-,CH <sub>2</sub> -NH-]                                                | [4 1 1 1]           | D130 | [-CH <sub>3</sub> ,>CH <sub>2</sub> ,>C-NH <sub>2</sub> ,CH <sub>3</sub> -N<]                                           | [3 1 1 3]           |
| D91  | [-CH <sub>3</sub> ,>CH-NH <sub>2</sub> ,>C-NH <sub>2</sub> ,CH <sub>2</sub> -NH-]                                | [3 1 1 1]           | D131 | [-CH <sub>3</sub> ,>CH <sub>2</sub> ,>OH,->C-NH <sub>2</sub> ,CH <sub>3</sub> -N<,-CH <sub>2</sub> -N<]                 | [3 2 1 1 1 1]       |
| D92  | [-CH <sub>3</sub> ,>CH <sub>2</sub> ,>CH,-OH,CH <sub>3</sub> -NH-,CH <sub>2</sub> -NH-]                          | [1 2 1 1 1 1]       | D132 | [-CH <sub>3</sub> ,>CH <sub>2</sub> ,>C-NH <sub>2</sub> ,CH <sub>2</sub> -NH-,CH <sub>3</sub> -N<]                      | [3 2 1 1 1]         |
| D93  | [-CH <sub>3</sub> ,>CH <sub>2</sub> ,>OH,CH <sub>3</sub> -N<]                                                    | [1 2 1 3]           | D133 | [-CH <sub>3</sub> ,>CH <sub>2</sub> ,>OH,-CH <sub>2</sub> -NH-,CH <sub>2</sub> -N<]                                     | [2 2 1 2 1]         |
| D94  | [-CH <sub>3</sub> ,>C-NH <sub>2</sub> ,CH <sub>3</sub> -NH-,CH <sub>2</sub> -N<]                                 | [2 1 2 1]           | D134 | [-CH <sub>3</sub> ,>CH,-OH,-CH <sub>2</sub> -NH-,CH <sub>2</sub> -N<]                                                   | [3 1 1 2 1]         |
| D95  | [-CH <sub>3</sub> ,>CH <sub>2</sub> ,>CH,-OH,CH <sub>3</sub> -N<,-CH <sub>2</sub> -N<]                           | [2 1 1 2 1 1]       | D135 | [-CH <sub>3</sub> ,>CH,-CH <sub>2</sub> -NH <sub>2</sub> ,>C-NH <sub>2</sub> ,CH <sub>2</sub> -N<]                      | [4 1 1 1 1]         |
| D96  | [-CH <sub>3</sub> ,>CH <sub>2</sub> ,>OH,>CH-NH <sub>2</sub> ,CH <sub>2</sub> -NH-]                              | [1 3 1 1 1]         | D136 | [-CH <sub>3</sub> ,>CH <sub>2</sub> -NH-,CH <sub>3</sub> -N<]                                                           | [2 2 3]             |
| D97  | [-CH <sub>3</sub> ,>CH <sub>2</sub> ,>CH,-OH,>CH-NH <sub>2</sub> ,CH <sub>2</sub> -NH-]                          | [2 1 1 1 1 1]       | D137 | [-CH <sub>3</sub> ,>CH-NH <sub>2</sub> ,>C-NH <sub>2</sub> ,CH <sub>3</sub> -N<,-CH <sub>2</sub> -N<]                   | [4 1 1 1 1]         |
| D98  | [-CH <sub>3</sub> ,>C-NH <sub>2</sub> ,CH <sub>2</sub> -NH-]                                                     | [3 1 2]             | D138 | [-CH <sub>3</sub> ,>CH <sub>2</sub> ,>OH,->C-NH <sub>2</sub> ,CH <sub>2</sub> -N<]                                      | [4 1 1 1 2]         |
| D99  | [-CH <sub>3</sub> ,>CH <sub>2</sub> ,>OH,->C-NH <sub>2</sub> ,CH <sub>3</sub> -N<]                               | [2 3 1 1 1]         | D139 | [-CH <sub>3</sub> ,>CH <sub>2</sub> ,>CH,-OH,-CH <sub>2</sub> -NH-]                                                     | [2 3 1 1 2]         |
| D100 | [-CH <sub>3</sub> ,>CH <sub>2</sub> ,>OH,-CH <sub>2</sub> -NH-]                                                  | [1 3 1 2]           | D140 | [-CH <sub>3</sub> ,>CH <sub>2</sub> ,>C-NH <sub>2</sub> ,CH <sub>3</sub> -N<]                                           | [3 3 1 2]           |
| D101 | [-CH <sub>3</sub> ,>CH <sub>2</sub> ,>CH,-OH,-CH <sub>2</sub> -NH-]                                              | [2 1 1 1 2]         | D141 | [-CH <sub>3</sub> ,>CH <sub>2</sub> ,>CH-NH <sub>2</sub> ,>C-NH <sub>2</sub> ,CH <sub>3</sub> -N<]                      | [3 3 1 1 1]         |
| D102 | [-CH <sub>3</sub> ,>CH,-OH,-CH <sub>2</sub> -NH-,CH <sub>3</sub> -N<]                                            | [2 1 1 2 1]         | D142 | [-CH <sub>3</sub> ,>C-NH <sub>2</sub> ,CH <sub>2</sub> -NH-,CH <sub>2</sub> -N<]                                        | [4 1 2 1]           |
| D103 | [-CH <sub>3</sub> ,>CH <sub>2</sub> ,>CH <sub>2</sub> -NH <sub>2</sub> ,>C-NH <sub>2</sub> ,CH <sub>3</sub> -N<] | [2 2 1 1 1]         | D143 | [-CH <sub>3</sub> ,>C<,->C-NH <sub>2</sub> ,CH <sub>2</sub> -NH-,CH <sub>3</sub> -N<]                                   | [5 1 1 1 1]         |
| D104 | [-CH <sub>3</sub> ,>CH <sub>2</sub> ,>C-NH <sub>2</sub> ,CH <sub>3</sub> -NH-,CH <sub>3</sub> -N<]               | [2 2 1 1 1]         | D144 | [-CH <sub>3</sub> ,>CH <sub>2</sub> ,>C-NH <sub>2</sub> ,CH <sub>2</sub> -NH-,CH <sub>3</sub> -N<]                      | [3 3 1 1 1]         |
| D105 | [-CH <sub>3</sub> ,>CH <sub>2</sub> ,>OH,CH <sub>3</sub> -NH-,CH <sub>2</sub> -NH-,CH <sub>2</sub> -N<]          | [1 2 1 1 1 1]       | D145 | [-CH <sub>3</sub> ,>CH <sub>2</sub> ,>C-NH <sub>2</sub> ,CH <sub>2</sub> -NH-,CH <sub>3</sub> -N<]                      | [3 2 1 1 2]         |
| D106 | [>CH <sub>2</sub> ,>CH,-OH,CH <sub>3</sub> -NH-]                                                                 | [4 1 1 2]           | D146 | [-CH <sub>3</sub> ,>CH <sub>2</sub> ,>C-NH <sub>2</sub> ,CH <sub>3</sub> -N<,-CH <sub>2</sub> -N<]                      | [4 2 1 1 1]         |
| D107 | [-CH <sub>3</sub> ,>CH <sub>2</sub> ,>OH,-CH <sub>2</sub> -NH-,>CH-NH-]                                          | [2 2 1 1 1]         | D147 | [-CH <sub>3</sub> ,>CH <sub>2</sub> ,>CH-NH <sub>2</sub> ,>C-NH <sub>2</sub> ,CH <sub>2</sub> -N<]                      | [4 2 1 1 1]         |
| D108 | [-CH <sub>3</sub> ,>CH <sub>2</sub> ,>OH,CH <sub>3</sub> -N<,-CH <sub>2</sub> -N<]                               | [2 1 2 1 2]         | D148 | [-CH <sub>3</sub> ,>CH <sub>2</sub> ,>C-NH <sub>2</sub> ,CH <sub>2</sub> -NH-]                                          | [3 3 1 2]           |
| D109 | [-CH <sub>3</sub> ,>CH <sub>2</sub> ,>CH-NH <sub>2</sub> ,>C-NH <sub>2</sub> ,CH <sub>3</sub> -N<]               | [3 1 1 1 1]         | D149 | [-CH <sub>3</sub> ,>CH <sub>2</sub> ,>CH,->C-NH <sub>2</sub> ,CH <sub>2</sub> -NH-]                                     | [4 1 1 1 2]         |
| D110 | [-CH <sub>3</sub> ,>CH <sub>2</sub> ,>C<,-OH,-CH <sub>2</sub> -N<]                                               | [3 2 1 2 1]         | D150 | [-CH <sub>3</sub> ,>CH <sub>2</sub> ,>CH-NH <sub>2</sub> ,>C-NH <sub>2</sub> ,CH <sub>3</sub> -N<,-CH <sub>2</sub> -N<] | [4 1 1 1 1 1]       |

**Table E6 (Continued)**

|      |                                                                                                         |               |      |                                                                                                                           |               |
|------|---------------------------------------------------------------------------------------------------------|---------------|------|---------------------------------------------------------------------------------------------------------------------------|---------------|
| D111 | [-CH <sub>3</sub> ,>CH <sub>2</sub> ,-OH,->C-NH <sub>2</sub> ,CH <sub>3</sub> -N<,-CH <sub>2</sub> -N<] | [3 1 1 1 1 1] | D151 | [-CH <sub>3</sub> ,>CH <sub>2</sub> ,->C-NH <sub>2</sub> ,-CH <sub>2</sub> -NH,-CH <sub>2</sub> -N<]                      | [4 2 1 1 1]   |
| D112 | [-CH <sub>3</sub> ,>CH <sub>2</sub> ,-OH,-CH <sub>2</sub> -NH,-CH <sub>2</sub> -N<]                     | [2 1 1 2 1]   | D152 | [-CH <sub>3</sub> ,>CH-NH <sub>2</sub> ,->C-NH <sub>2</sub> ,-CH <sub>2</sub> -N<]                                        | [5 1 1 2]     |
| D113 | [-CH <sub>3</sub> ,>CH <sub>2</sub> ,->CH-NH <sub>2</sub> ,->C-NH <sub>2</sub> ,-CH <sub>2</sub> -NH-]  | [3 1 1 1 1]   | D153 | [-CH <sub>3</sub> ,>CH <sub>2</sub> ,->C-NH <sub>2</sub> ,-CH <sub>2</sub> -NH,-CH <sub>3</sub> -N<]                      | [3 4 1 1 1]   |
| D114 | [-CH <sub>3</sub> ,>CH <sub>2</sub> ,->C-NH <sub>2</sub> ,CH <sub>3</sub> -NH,-CH <sub>2</sub> -N<]     | [3 1 1 1 1]   | D154 | [-CH <sub>3</sub> ,>CH <sub>2</sub> ,->CH,->C-NH <sub>2</sub> ,-CH <sub>2</sub> -NH,-CH <sub>3</sub> -N<]                 | [4 1 1 1 1 2] |
| D115 | [-CH <sub>3</sub> ,->C-NH <sub>2</sub> ,-CH <sub>2</sub> -NH,-CH <sub>3</sub> -N<]                      | [3 1 1 2]     | D155 | [-CH <sub>3</sub> ,>CH <sub>2</sub> ,->C-NH <sub>2</sub> ,CH <sub>3</sub> -N<,-CH <sub>2</sub> -N<]                       | [4 3 1 1 1]   |
| D116 | [-CH <sub>3</sub> ,>CH <sub>2</sub> ,->C-NH <sub>2</sub> ,CH <sub>3</sub> -N<]                          | [4 1 2 1]     | D156 | [-CH <sub>3</sub> ,->C-NH <sub>2</sub> ,-CH <sub>2</sub> -N<]                                                             | [6 2 2]       |
| D117 | [-CH <sub>3</sub> ,>CH <sub>2</sub> ,->CH,-OH,->CH-NH <sub>2</sub> ,-CH <sub>2</sub> -NH-]              | [2 2 1 1 1 1] | D157 | [-CH <sub>3</sub> ,>CH <sub>2</sub> ,->C-NH <sub>2</sub> ,-CH <sub>2</sub> -NH,-CH <sub>3</sub> -N<,-CH <sub>2</sub> -N<] | [4 2 1 1 1 1] |
| D118 | [-CH <sub>3</sub> ,>CH <sub>2</sub> ,->CH,-OH,->C-NH <sub>2</sub> ]                                     | [4 1 2 1 1]   |      |                                                                                                                           |               |

**Table E7:** Names, abbreviations, CAS numbers and literature sources of amines reported in the manuscript without being part of any of the investigated datasets.

| ID | Name                          | Abbrev. | CAS Registry Number | Source                        |
|----|-------------------------------|---------|---------------------|-------------------------------|
| E1 | Butylmonoethanolamine         | BMEA    | 111-75-1            | Rooney <sup>69</sup>          |
| E2 | 1-Amino-2-propanol            | MIPA    | 2799-16-8           | Hamborg <sup>75</sup>         |
| E3 | Diisopropylamine              | DIPA    | 142-84-7            | Zhang et al. <sup>71</sup>    |
| E4 | Tributylamine                 | TBA     | 102-82-9            | Zhang et al. <sup>71</sup>    |
| E5 | 3-Dimethyl-amino-1-propanol   | 3DMA1P  | 3179-63-3           | Kadiwala et al. <sup>76</sup> |
| E6 | N,N-Dimethyl cyclohexylamine  | DMCA    | 98-94-2             | Zhang et al. <sup>71</sup>    |
| E7 | Bis-(3-dimethylaminopropanol) | TMBPA   | 6711-48-4           | Aronu et al. <sup>4</sup>     |

**Section F: Assessment of the 29 solvents selected from the databases (Classes C and R)**

The 29 solvents selected in Stage 1 for the Selection problem (Tables 4-6) are discussed here in terms of their structural characteristics and likely CO<sub>2</sub> capture potential. The abbreviations of the amines discussed in each paragraph are reported as a heading so that they can be easily tracked.

**Primary amines of Table 4**AMP

The smallest primary amine is a branched molecule rather than the smallest [OCCN] molecule, MEA, which has not been selected as one of the most promising solvents despite its inclusion in the database. In 2-amino-propanol (2AP), 2-amino-1-butanol (2A1B), 2-amino-1-pentanol (2A1PN) and 2-amino-1-hexanol (2A1H) the  $\alpha$ -carbon hydrogen atom of MEA is substituted by a carbon chain which generally increases the steric hindrance. This is even more pronounced in 2-amino-2-methyl-1-propanol (AMP) which is a well-known sterically-hindered amine. AMP is one of the most investigated amines in CO<sub>2</sub> capture literature and has been tested in a pilot unit as the solvent of choice in a mixture with piperazine in the CESAR project<sup>48</sup>.

2A1B, 2A1PN, 2A1H

2A1B, 2A1PN and 2A1H have been considered in mixtures with methyldiethanolamine (MDEA-R16) where they were tested experimentally in terms of stability and corrosiveness with respect to carbon steel<sup>69</sup>. The tests were motivated by the discovery that an aqueous mixture comprising

a tertiary alkanolamine and a primary alkanolamine with a secondary carbon atom attached to the amino group (such as 2A1B, 2A1PN and 2A1H) is not only effective in removing acidic gases but it also exhibits unexpectedly low degradation, corrosiveness and metals solubility properties. 2A1B was found to exhibit very high stability and low corrosiveness, performing much better than ethylaminoethanol (EMEA) and butylmonoethanolamine (BMEA)<sup>69</sup>.

#### 2AP, MIPA, MDEA

2AP was investigated by Da Silva<sup>47</sup> who reported a carbamate stability close to that of MEA. If the methyl group is moved to the  $\beta$ -carbon atom, the structure becomes 1-amino-2-propanol (MIPA)<sup>75</sup> which presents CO<sub>2</sub> solubility behaviour very similar to MDEA at the same concentration, and much higher than MEA, diethanolamine (DEA) and diisopropanolamine (DIPA)<sup>77</sup>. MDEA is a sterically hindered amine of high industrial interest due to increased absorption capacity and high selectivity towards contaminants such as H<sub>2</sub>S<sup>77</sup>. Considering that MDEA has a  $pK_a$  of 8.56 and MIPA of 9.45<sup>75</sup> it is clear that the latter is likely to exhibit much faster kinetics. Note that MIPA was not in the set of available amines, otherwise it is likely that it might have been identified in the 29 selected solvents. In any case, MIPA was identified here due to its resemblance to 2AP and is therefore worth of further investigation.

#### ***Secondary amines of Table 4***

##### MMEA, BEA

The molecules in the -NH- row of Table 4 are also based on the same main [OCCN] structure as previously. The pattern that appears toward the right end of each structure, as drawn in the table, results from substitution of a hydrogen atom of the MEA amine group by different carbon chains which gradually increase from left-to-right. 2-(methylamino)-ethanol (MMEA) has a slightly higher absorption rate than MEA at low loadings and considerably outperforms MEA at higher loadings<sup>49</sup>. MMEA also has a somewhat higher molecular weight and therefore, a lower molar concentration. In addition, MMEA has a moderate carbamate stability resulting in increased absorbed amounts of CO<sub>2</sub> at low partial pressure. Both MMEA and 2-(butylamino)-ethanol (BEA) exhibit foaming and MMEA is in this respect worse than BEA<sup>49</sup>.

##### EMEA, PAE

Ethylaminoethanol (EMEA) is also a well-known secondary amine which exhibits considerably higher CO<sub>2</sub> loadings than MEA, DEA and MMEA (at 30% w/w) over a wide range of pressures<sup>50</sup>. 2-Propylamino-ethanol (PAE) exhibits much higher CO<sub>2</sub> loadings than MEA and higher CO<sub>2</sub> cyclic capacity than both MEA and DEA<sup>70</sup>. At 30 wt% and 313K EMEA exhibits a CO<sub>2</sub> loading of over 0.9 after approximately 75 kPa of pressure with a tendency to rise up to 1.5 mole/CO<sub>2</sub> mole amine at 550 kPa<sup>50</sup>. At the same specifications PAE exhibits a CO<sub>2</sub> loading slightly over 0.8, with a similar tendency to rise<sup>70</sup>. A comparative study by Yamada et al.<sup>2</sup> of EMEA, PAE and BEA indicates that they all exhibit relatively similar CO<sub>2</sub> loadings which are mainly affected by the length of the hydroxyl chain (i.e. at the left end of the amine nitrogen).

### IPAE, 1M2P

2-(Isoprpylamino)-ethanol (IPAE) is very similar to PAE, exhibiting slightly higher CO<sub>2</sub> loadings due to increased steric hindrance, but lower reaction rates<sup>70</sup>. The structure of 1-methylamino-propan-2-ol (1M2P) is very similar to MMEA with the addition of a methyl group next to the hydroxyl, which makes the hydroxyl attached to a  $\beta$ -carbon atom with respect to the amine. This is likely to follow the heuristic of Structure-Property Relation (3) in Table 1 when 1M2P is compared with MMEA.

### DIBA, DsBA, DIPA

Diisobutylamine (DIBA) and Di-sec butylamine (DsBA)<sup>71, 72</sup> belong to the important class of thermomorphic biphasic solvents (TBS), comprising lipophilic amines as the active components which exhibit a liquid–liquid phase separation (LLPS) upon heating. This enables the non-thermal extraction of a lean CO<sub>2</sub> phase prior to desorption which may take place at much lower temperatures than the 120°C of conventional systems. The low regeneration temperature of often less than 90°C together with the high cyclic CO<sub>2</sub> loading capacity considerably reduces the energetic desorption requirements. Furthermore, low-grade heat (e.g. recovered from a waste heat stream) may be used as an option instead of steam, whereas solvent degradation is typically lower at lower temperatures. The results from experimental investigations of DIBA indicate fast kinetics up to a CO<sub>2</sub> loading of approximately 0.6-0.65 mol/mol amine, which is the maximum capacity achieved<sup>71, 72</sup>. The very similar Diisopropylamine (DIPA)<sup>71</sup> exhibits fast kinetics up to a loading of approximately 0.9 mol/mol amine. Note that DIPA was not on our set of examined amines. From a structural perspective DIBA and DsBA fall into Structure-Property relation (5). DsBA is very similar to DIBA except that the two side methyl groups have been moved to the  $\alpha$ -carbon after the amine. This is a useful option because the undesired insoluble carbamate salts formation associated with DIBA may be avoided while the reaction kinetics may be improved due to the branching moved to the  $\alpha$ -carbon<sup>71</sup>. DsBA is considered an interesting regeneration promoter with a liquid–liquid phase separation temperature for the 3M solution at 60°C and over 95% regenerability at 80°C.

### ***Tertiary amines of Table 4***

#### DMMEA

N,N-Dimethylaminoethanol (DMMEA) is a tertiary amine with exactly the same type and number of functional groups as AMP, except that the -CH<sub>3</sub> branch is not on the  $\alpha$ -carbon. Instead, it is directly connected to the nitrogen atom, which leaves no hydrogen atom on the amine functional group. This eliminates the possibility of carbamate formation between the DMMEA and CO<sub>2</sub>, which has two direct effects on the amine properties<sup>51</sup>. Compared with primary and secondary amines, DMMEA has larger absorption capacity, while the energy required to reverse the amine-CO<sub>2</sub> reaction is lower for DMMEA than for amines which can form carbamate with CO<sub>2</sub>. As a tertiary amine it has a low absorption rate so it can be used with an additional activator (i.e., rate promoter).

#### DEEA, DPE

N,N-Diethylethanolamine (DEEA) can be considered as a promising absorbent. It includes two ethyl groups replacing the hydrogen atoms of the amino group in MEA, it reacts slowly with CO<sub>2</sub> because of its tertiary amine characteristics but enables high CO<sub>2</sub> loading capacity<sup>52</sup>. Di-N-Propylethylamine (DPE) is structurally very similar to Tributylamine (TBA) and only differs by one –CH<sub>2</sub> group. TBA is reported to result in low loadings<sup>5</sup> hence a similar behavior may be expected.

#### ***Primary and secondary amines of Table 5***

##### MPA, DBA

The structures in Table 5 follow a similar pattern as those in Table 4 but including molecules of the structural types [OCCCN] or [CCCCN]. Structure [OCCCN] is in line with Structure-Property Relation (1) in Table 1. 3-Amino-1-propanol (MPA-R8) is one carbon atom longer, reacts faster with CO<sub>2</sub><sup>53</sup> and has increased absorption capacity compared to MEA<sup>78</sup>. Recently, MPA has been patented in a mixture with AMP<sup>79</sup> which combines the faster kinetics of MPA with the favourable regeneration and CO<sub>2</sub> solubility features of AMP. Additional major advantages of this mixture compared to either MEA or MEA with AMP include reduced oxidative degradation, corrosiveness and formation of nitrosamines. 4-amino-2-butanol (4A2B) is exactly one carbon atom longer than MIPA<sup>75</sup> hence it may reasonably be expected that it will exhibit a similar performance. It exhibits a hydroxyl group three carbon atoms away from the amino nitrogen hence it falls within Structure-Property Relation (1). Di-N-Butylamine (DBA) is also known as a biphasic solvent<sup>71</sup>.

#### ***Tertiary amines of Table 5***

##### 3DAP, 3DMA1P, ND1B, 1EDB

The closest structure to 3-(diethyl-amino)-propanol (3DAP) which has been considered as a CO<sub>2</sub> capture option is 3-dimethyl-amino-1-propanol (3DMA1P), which has been shown to exhibit favourable reaction kinetics compared to MDEA<sup>76</sup>. 4-diethylamino-2-butanol (DEAB) is an interesting amine, designed specifically based on Structure-Property Relation (1) to exhibit higher CO<sub>2</sub> capacity, improved reaction rates and lower regeneration energy than MDEA<sup>54</sup>. N,N-Diethyl-1-Butanamine (ND1B) is similar to DPE and also to 3DAP, where the hydroxyl is replaced by a methyl group. ND1B is expected to exhibit lower CO<sub>2</sub> absorption capacity than 3DAP due to the absence of hydroxyl and also low reaction rate because it is a tertiary amine. 1-Ethyl-N,N-dimethylbutylamine (1EDB) appears to exhibit increased steric hindrance due to the bulky constituents around the amino nitrogen which may support CO<sub>2</sub> absorption capacity.

##### TMEDA, 2P12P

The last 2 amines in Table 5 have completely different structural characteristics compared to other solvents. N,N,N',N'-tetramethyl-1,2-Ethanediamine (TMEDA) has been considered in published literature (Bouzina et al., 2012) in a work that investigated experimental VLE in mixtures of this solvent with water while no work is mentioned regarding VLE of this solvent with water and CO<sub>2</sub>. N,N,N',N',2-pentamethyl-1,2-propanediamine (2P12P) is structurally

similar with TMEDA, except that 2 methyl groups replace the hydrogen atoms in the  $\alpha$ -carbon atom after the amine group. These 2 groups are likely to increase steric hindrance, while both amines will improve in terms of basicity and desorption capacity by increasing the chain length between the amine groups according to Structure-Property Relation (2).

### ***Amines of Table 6***

#### **4AP, 4D1B**

Table 6 contains amines of longer chains but of similar structural characteristics as the amines in Tables 4 and 5. 4-amino-pentanol (4AP) appears to be very similar with 2AP. The longer chain of 4 carbon atoms implies an improved desorption capacity compared to 2AP, based on Structure-Property Relation (4). 5-amino-pentanol (5AP) is one amine used in the experiments reported in Singh et al.<sup>6, 7, 74</sup> hence it is expected to have lower absorption and desorption capacities compared to hydroxyl-amines of three and four carbons atoms. 4-(Dimethylamino)-1-butanol (4D1B) is very similar to the previously discussed 3DMA1P<sup>76</sup>, with the previous insights regarding the chain lengths also likely to apply in this case.

#### **HEXA**

Hexamine (HEXA) has been investigated experimentally on several occasions<sup>6, 7, 71</sup> leading to the conclusion that it exhibits very high absorption capacity and high absorption rates compared to very similar molecules like Heptylamine and Octylamine. It is an interesting phase-change solvent which exhibits liquid-liquid phase separation temperature of 90°C (3 M solution) and regenerability of 40% at 80°C<sup>80</sup>. Together with the high absorption rate, these characteristics make it a useful absorption activator in mixtures with regenerator promoters like DsBA. On the other hand, cyclic variants of HEXA like N,N-Dimethyl Cyclohexylamine (DMCA) have been experimentally studied in Zhang et al.<sup>71</sup>, indicating increased absorption capacity and ability for very good desorption at 90°C.

### **Cited References**

1. G. Puxty, R. Rowland, A. Allport, Q. Yang, M. Bown, R. Burns, M. Maeder and M. Attalla, *Environ. Sci. Technol.*, 2009, **43**, 6427–6433.
2. H. Yamada, F.A. Chowdhury, Y. Matsuzaki, K. Goto, T. Higashii, S. Kazama, *Energy Procedia*, 2013, **37**, 499-504.
3. P. Tontiwachwuthikul, A.G.H. Wee, R. Idem, K. Maneeintr, G.-J. Fan, A. Veawab, A. Henni, A. Aroonwilas and A. Chakma, *US Pat.*, 7 910 078, 2011.
4. U.E. Aronu, H.F. Svendsen and K.A. Hoff, in *Proceedings of Distillation Absorption 2010*, A.B. de Haan, H. Kooijman H. and A. Górak, 2010, 151-156.
5. P. Singh and G.F. Versteeg, *Process Saf. Environ. Prot.*, 2008, **86**, 347–359.
6. P. Singh, D.W.F. Brilman and M.J. Groeneveld, *Energy Procedia*, 2009, **1**(1), 1257-1264.
7. P. Singh, J.P.M. Niederer and G.F. Versteeg, *Int. J. Greenhouse Gas Control*, 2009, **87**, 135-144.
8. J. Zhang, Y. Qiao, D.W. Agar, *Energy Procedia*, 2012, **23**, 92-101.



9. G. Sartori, W.S. Ho, D.W. Savage, G.R. Chludzinski and S. Wlechert, *Sep. Purif. Rev.*, 1987, **16** (2), 171-200.
10. C. Cao, L. Liu, *J. Chem. Inf. Comput. Sci.*, 2004, **44**, 678-687
11. P. Singh, PhD Thesis, University of Twente, The Netherlands, 2011.
12. S.H. Ali, O. Al-Rashed and S.Q. Merchant, *Sep. Purif. Technol.*, 2010, **74** (1), 64-72.
13. O. Ivanciuc and T.A. Balaban, *Croat. Chem. Acta*, 1996, **69** (1), 75-83.
14. B.E. Poling, J.M. Prausnitz, J.P. O'Connell, *The properties of gases and liquids*, McGraw-Hill, New York, 2001.
15. J. Wisniak, A. Apelblat A. and H. Segura, *Chem. Eng. Sci.*, 1998, **53** (4), 743-751.
16. A.V. Rayer, A. Henni and P. Tontiwachwuthikul, *Can. J. Chem. Eng.*, 2012, **90**, 367-376.
17. E. Conte, A. Martinho, H.A. Matos and R. Gani, *Ind. Eng. Chem. Res.*, 2008, **47** (20), 7940-7954.
18. T.J. Sheldon, C.S. Adjiman and J.L. Cordiner, *Fluid Phase Equilib.*, **231**, 27-37.
19. S.R.S. Sastri, K.K. Rao, *Chem. Eng. J.*, 1992, **50** (1), 9-25.
20. J. Marrero and R. Gani, *Fluid Phase Equilib.*, 2001, **183**, 183-208.
21. A.S. Hukkerikar, B. Sarup, A. Ten Kate, J. Abildskov, G. Sin and R. Gani, *Fluid Phase Equilib.*, 2012, **321**, 25-43.
22. Marvin 6.0.5, <http://www.chemaxon.com>, (accessed April 2015).
23. G. Wernet, S. Papadokonstantakis, S. Hellweg and K. Hungerbühler, *Green Chem.*, 2009, **11**, 1826-1831.
24. L. Constantinou, R. Gani and J.P. O'Connell, *Fluid Phase Equilib.*, 1995, **103** (1), 11-22.
25. E. Stefanis and C. Panayiotou, *Int. J. Thermophys.*, 2008, **29** (2), 568-585.
26. C.M. Hansen, *J. Paint Technol.*, 1967, **39**, 104-117.
27. C. M. Hansen, *Prog. Org. Coat.*, 2004, **51** (1), 77-84.
28. F.J.G. Retief, MSc. Thesis, Stellenbosch University, South Africa, 2012.
29. H. Sugiyama, U. Fischer, K. Hungerbühler and M. Hirao, *AIChE J.*, 2008, **54**, 1037-1053.
30. EPI-Suite: Estimation Program Interface,  
<http://www.epa.gov/opptintr/exposure/pubs/episuite.htm> (accessed February 2015).
31. TEST: Toxicity Estimation Software Tool, <http://www.epa.gov/nrmrl/std/qsar/qsar.html>  
(accessed February 2015).
32. A. Lymperiadis, C.S. Adjiman, G. Jackson and A. Galindo, *Fluid Phase Equilib.*, 2008, **274**, 85-104.
33. A. Lymperiadis, C.S. Adjiman, A. Galindo and G. Jackson, *J. Chem. Phys.*, 2007, **127** (23), 234903.
34. N. Mac Dowell, F.E. Pereira, F. Llovel, F.J. Blas, C.S. Adjiman, G. Jackson and A. Galindo, *J. Phys. Chem. B*, 2011, **115** (25), 8155-8168.
35. I.G. Economou and M.D. Donohue, *AIChE J.*, 1991, **37** (12), 1875-1894.
36. A. Gil-Villegas, A. Galindo, P.J. Whitehead, S.J. Mills, G. Jackson and A.N. Burgess, *J. Chem. Phys.*, 1997, **106** (10), 4168-4186.
37. A. Galindo, L.A. Davies, A. Gil-Villegas and G. Jackson, *Mol. Phys.*, 1998, **93** (2), 241-252.
38. N. Mac Dowell, F. Llovel, C.S. Adjiman, G. Jackson and A. Galindo, *Ind. Eng. Chem. Res.*, 2010, **49**, 1883-1899.

39. J. Rodriguez, N. Mac Dowell, F. Llovel, C.S. Adjiman, G. Jackson and A. Galindo, *Mol. Phys.*, 2012, **110**, 1325-1348.
40. A. Chremos, E. Forte, V. Papaioannou, A. Galindo, G. Jackson and C.S. Adjiman, *Chem. Eng. Trans.*, 2013, **35**, 427-432.
41. A. Chremos, E. Forte, V. Papaioannou, A. Galindo, G. Jackson and C.S. Adjiman, *Fluid Phase Equilib.*, 2016, **407**, 280-297.
42. A. Chremos, A. Galindo, G. Jackson and C.S. Adjiman, Predictive SAFT- $\gamma$  SW models for application in the development in absorption processes for carbon capture, Unpublished work, 2016.
43. V. Papaioannou, C.S. Adjiman, G. Jackson and A. Galindo, *Fluid Phase Equilib.*, 2011, **306** (1), 82-96.
44. G. Kumar, PhD Thesis, National Institute of Technology, Rourkela, Odisha, India, 2013.
45. G. Kumar, M. Kundu, *Can. J. Chem. Eng.*, 2012, **90** (3), 627-630.
46. S.H. Ali, S.Q. Merchant, M.A. Fahim, *Sep. Purif. Technol.*, 2002, **27** (2), 121-136.
47. E.F. Da Silva, *Energy Procedia*, 2011, **4**, 164-170.
48. I. Harbou, H.P. Mangalapally and H. Hasse, *Int. J. Greenhouse Gas Control*, 2013, **18**, 305-314.
49. S. Ma'mun, PhD Thesis, NTNU, Norway, 2005.
50. G. Kumar, PhD Thesis, National Institute of Technology, Rourkela, Odisha, India, 2013.
51. D. Tong, PhD Thesis, Imperial College London, UK, 2012.
52. P.N. Sutar, P.D. Vaidya and E.Y. Kenig, *Chem. Eng. Sci.*, 2013, **100**, 234-241
53. A. Henni, J. Li and P. Tontiwachwuthikul, *Ind. Eng. Chem. Res.*, 2008, **47**, 2213-2220.
54. T. Sema, A. Naami, Z. Liang, R. Idem, P. Tontiwachwuthikul, H. Shi, P. Wattanaphan and A. Henni, *Chem. Eng. Sci.*, 2008, **81**, 251-259.
55. M. Stec, A. Tatarczuk, D. Spiewak and A. Wilk, *J. Solution Chem.*, 2014, **43**, 959-971.
56. J. Oexmann, PhD thesis, University of Hamburg, Germany, 2011
57. I. Kim, H.F. Svendsen, *Int. J. Greenhouse Gas Control*, 2011, **5**, 390-395.
58. S. Bishnoi, PhD thesis, University of Texas at Austin, 2000.
59. G.T. Rochelle, Summary of 2nd Quarterly Progress Reports 2010, [http://research.engr.utexas.edu/rochelle/images/stories/publications/Rochelle\\_Q2\\_Report\\_2009.pdf](http://research.engr.utexas.edu/rochelle/images/stories/publications/Rochelle_Q2_Report_2009.pdf) (accessed February 2016)
60. U.E. Aronu, H.F. Svendsen, K.A. Hoff and O. Juliussen, *Energy Procedia*, 2009, **1**, 1051-1057.
61. G.F. Versteeg, L.A.J. Van Dijck, and W.P.M. Van Swaaij, *Chem. Eng. Commun.*, 1996, **144** (1), 113-158.
62. R.K. Chauhan, S.J. Yoon, H. Lee, J.H. Yoon, J.G. Shim, G.C. Song and H.M. Eum, *Fluid Phase Equilib.*, 2003, **208** (1-2), 239-245
63. N.J.M.C. Penders, P.W.J. Derks, G.F. Versteeg, E. Madore, R. Sheldon, N. Voyer, S. Fradette, J. Carley and G.R. Kelly, *WIPO Pat.* WO2012/167 388A1, 2012.
64. J.I. Baek and Yoon J.H., *J. Chem. Eng. Data*, 1998, **43** (4), 635-637
65. M. Lijima and S. Mitsuoka, *US Pat.* 5 736 115 A, 1998.

66. NIST (National Institute of Standards) Chemistry Webbook  
<http://webbook.nist.gov/chemistry> (accessed February 2016).
67. EPA (Environmental Protection Agency), <http://www.epa.gov> (accessed February 2016).
68. Sigma-Aldrich (Commercial catalogue), <http://www.sigmaaldrich.com/catalog>, (accessed February 2016).
69. C. Rooney, *US Pat.* 6 165 432 A, 2000.
70. H. Yamada, F.A. Chowdhury, K. Goto and T. Higashii, *Int. J. Greenhouse Gas Control*, 2013, **17**, 99-105
71. J. Zhang, Y. Qiao, D.W. Agar, *Energy Procedia*, 2012, **23**, 92-101.
72. J. Zhang, Y. Qiao and D.W. Agar, *Chem. Eng. Res. Des.*, 2012, **90**, 743–749.
73. Z. Bouzina, A. Negadi, I. Mokbel, J. Jose and L. Negadi, presented at AIChE Annual Meeting, Pittsburgh, USA, November, 2012.
74. P. Singh, J.P.M. Niederer and G.F. Versteeg, *Int. J. Greenhouse Gas Control*, 2007, **1**, 5-10.
75. E.S. Hamborg, PhD Thesis, Groningen University, The Netherlands, 2011.
76. S. Kadiwala, A.V. Rayer and A. Henni, *Chem. Eng. J.*, 2012, **179**, 262– 271.
77. M.G. Rebolledo-Morales, M.E. Rebolledo-Libreros and A. Trejo, *J. Chem. Thermodyn.*, 2011, **43** (5), 690-695.
78. L. Dong, J. Chen and G. Gao, *J. Chem. Eng. Data*, **55**, 2010, 1030–1034.
79. A.K. Hoff, T. Mejdell, I. Kim, A. Grimstvedt and E.F. Silva, *WIPO Pat.* WO 2014/086 988 A1, 2014.
80. Y.H. Tan, PhD Thesis, University of Dortmund, Germany, 2010.
